# 1 Co-condensation of proteins with single- and double- 2 stranded DNA

## 3 4 Authors

5 Roman Renger<sup>1,2</sup>, Jose A. Morin<sup>1,3</sup>, Regis Lemaitre<sup>1</sup>, Martine Ruer-Gruss<sup>1</sup>, Frank Jülicher<sup>4,7</sup>,  
6 Andreas Hermann<sup>2,5,6</sup>, Stephan W. Grill<sup>1,3,7,\*</sup>

## 7 8 Affiliations

9 <sup>1</sup> Max Planck Institute of Molecular Cell Biology and Genetics, Pfotenhauerstraße 108,  
10 Dresden, Germany.

11 <sup>2</sup> German Center for Neurodegenerative Diseases (DZNE), Dresden, Germany

12 <sup>3</sup> Biotechnologisches Zentrum, Technische Universität Dresden, Tatzberg 47/49, Dresden,  
13 Germany.

14 <sup>4</sup> Max Planck Institute for the Physics of Complex Systems, Nöthnitzer Straße 38, Dresden,  
15 Germany

16 <sup>5</sup> Translational Neurodegeneration Section “Albrecht-Kossel”, Department of Neurology, and  
17 Center for Transdisciplinary Neurosciences, University Medical Center Rostock, University of  
18 Rostock, Rostock, Germany

19 <sup>6</sup> German Center for Neurodegenerative Diseases (DZNE), Rostock/Greifswald, Rostock,  
20 Germany

21 <sup>7</sup> Cluster of Excellence Physics of Life, Technische Universität Dresden, Dresden, Germany

22  
23  
24 \* Correspondence to: grill@mpi-cbg.de  
25

## 26 Summary

27 Biomolecular condensates provide distinct compartments that can localize and organize  
28 biochemistry inside cells. Recent evidence suggests that condensate formation is prevalent in  
29 the cell nucleus and associated with a variety of important processes ranging from  
30 transcriptional regulation to DNA repair. To understand how different components of the  
31 nucleus interact during condensate formation is an important challenge. In particular, the  
32 physics of co-condensation of proteins together with nucleic acids remains elusive. Here, we  
33 use optical tweezers to study how the prototypical prion-like protein Fused-in-Sarcoma (FUS)  
34 forms liquid-like assemblies *in vitro*, by co-condensing together with individual single- and  
35 double stranded DNA molecules. Through progressive DNA unpeeling, buffer exchange and  
36 direct force measurements, we show that FUS adsorbing in a single layer on DNA effectively  
37 generates a sticky FUS-DNA polymer that can collapse to form a liquid-like FUS-DNA co-  
38 condensate. For double-stranded DNA, this condensation occurs at constant DNA tension  
39 which is a signature of a phase separation phenomenon. We suggest that co-condensation  
40 mediated by protein adsorption on nucleic acids is an important mechanism for forming  
41 intracellular compartments.  
42

## 43 Keywords

44 optical tweezers, biomolecular condensates, nucleic acids, FUS, DNA, phase transition,  
45 monolayer adsorption, co-condensation

## 46 **Introduction:**

47 Many cellular compartments that provide distinct biochemical environments are not separated  
48 by a lipid membrane. An important class of such membrane-less compartments are formed by  
49 the condensation of proteins and other components in dynamic assemblies called biomolecular  
50 condensates (Hyman, Weber and Jülicher, 2014; Aguzzi and Altmeyer, 2016; Banani *et al.*,  
51 2017). Biomolecular condensates increase the local concentration of their components, which  
52 can lead to substantially accelerated biochemical reactions (Li *et al.*, 2012; Hernández-Vega *et al.*,  
53 2017). Condensates that form beyond a saturation concentration can buffer the cellular  
54 concentration of molecules while at the same time clamping the concentration of phase-  
55 separated components inside (Klosin *et al.*, 2020). Biomolecular condensates could also  
56 localize reaction components, and by excluding molecules from condensates they can  
57 contribute to enhance specificity of biochemical processes. The formation of biomolecular  
58 condensates often relies on the existence of low-complexity domains (Han *et al.*, 2012; Kwon  
59 *et al.*, 2013; Patel *et al.*, 2015; Wang *et al.*, 2018). Condensates can show liquid-like material  
60 properties: they deform under shear stress, fuse, round up and exchange their constituents with  
61 the environment (Brangwynne *et al.*, 2009; Jawerth *et al.*, 2018, 2020).

62  
63 Many condensed structures play essential roles in nuclear organization. For example,  
64 heterochromatin is a dense form of chromatin in which DNA co-condenses with specific factors  
65 as well as nucleosomes to form transcriptionally silent domains of chromatin (Larson *et al.*,  
66 2017; Strom *et al.*, 2017; Larson and Narlikar, 2018; Sanulli *et al.*, 2019; Keenen *et al.*, 2021).  
67 Furthermore, transcriptional condensates are dense and dynamic assemblies of transcription  
68 factors, associated proteins, DNA and RNA. Such condensates have been suggested to play an  
69 important role in the generation of transcriptional hubs that could coordinate the expression of  
70 several genes and mediate enhancer function (Cho *et al.*, 2018; Sabari *et al.*, 2018; Guo *et al.*,  
71 2019; Henninger *et al.*, 2021). Recently it was shown that a pioneer transcription factor can  
72 form co-condensates together with DNA *in vitro* (Quail *et al.*, 2020). Some membrane-less  
73 compartment in the cell nucleus, such as the nucleolus, show all the features of liquid-like  
74 condensates (Brangwynne, Mitchison and Hyman, 2011; Feric *et al.*, 2016). However, for the  
75 majority of smaller nuclear compartments, the physical mechanisms by which they form  
76 remain controversial. In particular, the physicochemical mechanisms that drive co-  
77 condensation of proteins together with nucleic acids remain not well understood.

78  
79 A prominent nuclear condensate is formed after DNA damage, where multiple proteins come  
80 together at the damage site to repair DNA (Aleksandrov *et al.*, 2018; Levone *et al.*, 2021).  
81 Early components of the DNA damage condensate are members of the FET family such as the  
82 prion-like protein Fused-in-Sarcoma (FUS) (Altmeyer *et al.*, 2015; Patel *et al.*, 2015; Naumann  
83 *et al.*, 2018). FUS has been shown to form liquid-like condensates in bulk solution at  $\mu\text{M}$  FUS  
84 concentrations (Patel *et al.*, 2015; Maharana *et al.*, 2018). However, its role in forming DNA  
85 repair compartments remains unknown.

86  
87 FUS is a modular protein that consists of a nucleic acid binding domain containing various  
88 nucleic acid binding motifs and an intrinsically disordered low-complexity domain that  
89 mediates FUS self-interaction (Schwartz *et al.*, 2013; Wang, Schwartz and Cech, 2015) It is  
90 involved in a multitude of physiological intracellular processes related to nucleic acid  
91 metabolism, for example transcriptional regulation (Tan *et al.*, 2012; Yang *et al.*, 2014), mRNA  
92 splicing (Rogelj *et al.*, 2012), processing of non-coding RNA (Shelkovnikova *et al.*, 2014),  
93 DNA damage response (Aleksandrov *et al.*, 2018; Naumann *et al.*, 2018; Singatulina *et al.*,  
94 2019; Levone *et al.*, 2021), ensuring mRNA stability (Kapeli *et al.*, 2016), mRNA trafficking

95 (Fujii and Takumi, 2005) and regulation of mRNA translation under stress conditions (Li *et*  
96 *al.*, 2013). FUS also forms higher order aggregated and oligomeric assemblies in a set of  
97 neurodegenerative disorders (Patel *et al.*, 2015; Naumann *et al.*, 2018; Alberti and Dormann,  
98 2019)

99  
100 While performing its physiological tasks, FUS typically acts in dynamic assemblies that are  
101 formed with or on nucleic acids or nucleic acid-like polymers. In the context of DNA damage,  
102 the formation and dissolution of FUS condensates depends on the presence or absence of  
103 poly(ADP-ribose) (PAR), a DNA-like sugar polymer produced by PAR polymerases  
104 (Altmeyer *et al.*, 2015; Aleksandrov *et al.*, 2018; Naumann *et al.*, 2018; Singatulina *et al.*,  
105 2019). Other examples for FUS-enriched condensates are stress granules, which are dynamic  
106 cytoplasmic hubs that form upon heat stress (Li *et al.*, 2013; Patel *et al.*, 2015) or nuclear  
107 granules, which are associated with transcription and splicing (Patel *et al.*, 2015; Thompson *et*  
108 *al.*, 2018)

109  
110 To investigate the physics underlying FUS-DNA condensate formation, we devised an *in vitro*  
111 assay based on optical tweezers combined with confocal microscopy. This allowed us to  
112 manipulate single DNA molecules in the presence of FUS protein in solution, image FUS  
113 proteins associating with the DNA molecule, and at the same time control and measure pN  
114 forces exerted on the DNA.

115

## 116 **Results**

117 We set out to establish a biophysical assay based on optical tweezers and confocal microscopy  
118 to investigate collective interactions between FUS and DNA. For this, we exposed individual  
119 lambda phage DNA molecules stretched between two polystyrene beads each held in place in  
120 an optical trap to FUS-EGFP (from here on called “FUS”) inside a microfluidics flow chamber  
121 (Figure 1A). Scanning confocal fluorescence microscopy was used to visualize the binding of  
122 FUS to DNA (van Mameren *et al.*, 2009; Candelli *et al.*, 2014; Brouwer *et al.*, 2016). We first  
123 trapped two streptavidin-coated polystyrene beads, which were then used to catch and stretch  
124 a lambda phage double stranded DNA (dsDNA) molecule that was biotinylated at the two  
125 termini of only one of its two complementary strands. Next, we verified that indeed only a  
126 single DNA molecule was stretched by evaluating the mechanical properties of the connection  
127 and comparing it to the properties of a single lambda phage DNA molecule (see below).  
128 Finally, we exposed the stretched DNA molecule to bulk FUS protein while imaging the system  
129 with a scanning confocal fluorescence microscope.

130

131 To study how FUS interacts with single-stranded DNA (ssDNA) and double-stranded DNA  
132 (dsDNA), we exposed FUS to lambda phage DNA in different mechanical and structural states.  
133 The relationship between mechanical and structural properties of DNA is reflected in its force-  
134 extension curve (Figure 1B) (Smith, Cui and Bustamante, 1996; van Mameren *et al.*, 2009;  
135 Gross *et al.*, 2011). At extensions (*i.e.*, end-to-end distances) of up to about 0.9 times the  
136 contour length of the molecule (16.5  $\mu\text{m}$  for lambda phage DNA) and at forces below  $\sim 10$  pN,  
137 DNA behaves as an entropic spring. We refer to this regime as ‘relaxed’. At higher forces and  
138 at extensions that are similar to the contour length, the DNA molecule behaves like a Hookian  
139 spring. At extensions significantly higher than the contour length, the DNA molecule is  
140 ‘overstretched’. In the overstressing regime, a progressive increase of the end-to-end distance  
141 of the molecule results in a progressive conversion of dsDNA to ssDNA while DNA tension  
142 remains constant at around 65 pN. In this process, ssDNA is unpeeled, starting at free ssDNA  
143 ends. Free ends exist at nicks in the DNA backbone and at the ends of the dsDNA molecule.

144 The overstretched DNA molecule consists of three distinct structural types of DNA: sections  
145 of stretched dsDNA interspersed with sections of stretched ssDNA (both load-bearing and at  
146 tensions of ~65 pN), with unpeeled and protruding ssDNA at the interfaces (Figure 1B, insets).  
147 The ratio between dsDNA and ssDNA is defined by the end-to-end distance to which the DNA  
148 molecule is overstretched. In this work, we used relaxed dsDNA to study the formation of FUS-  
149 dsDNA co-condensates, and we made use of unpeeled ssDNA protruding from overstretched  
150 DNA to study the formation of FUS-ssDNA co-condensates.

151

## 152 **FUS forms co-condensates with ssDNA**

153 To first investigate the interactions of FUS with ssDNA, we used optical traps to hold in place  
154 a single lambda phage DNA molecule extended to its contour length of 16.5  $\mu\text{m}$  and transferred  
155 into a microfluidics channel containing 100 nM FUS. Subsequently, we progressively  
156 increased its end-to-end distance to induce overstretching.

157

158 We observed that FUS attached to DNA in a spatially homogeneous manner upon transfer of  
159 the DNA molecule to the FUS channel (Figure 1C, Movie S1). When the DNA end-to-end  
160 distance was increased to achieve overstretching, the originally homogenous coverage of DNA  
161 by FUS became interspaced by regions that exhibited lower fluorescence intensity. At the  
162 interface between regions of higher and lower FUS intensity, FUS puncta emerged. When we  
163 increased the DNA end-to-end distance further, the length of regions with higher intensity  
164 decreased while the length of lower intensity regions increased. Concomitantly, the FUS puncta  
165 at the region interfaces grew in FUS intensity. Regions with high FUS intensity correspond to  
166 FUS unspecifically bound to stretched dsDNA (Figure 1D). Regions with low intensity  
167 correspond to FUS bound to stretched ssDNA, as these appear only during overstretching and  
168 grow with progressing overstretching (see Figure S2 for binding curves of FUS on stretched  
169 ssDNA and dsDNA). We interpret FUS puncta at interfaces between the low- and high density  
170 FUS regions as co-condensates of FUS with ssDNA, and provide evidence for condensation in  
171 the following sections. As the DNA is progressively overstretched, more and more unpeeled  
172 ssDNA is available, leading to growth of FUS-ssDNA co-condensates. We conclude that  
173 during overstretching, FUS binds to DNA in a manner that depends on the structural state of  
174 DNA: it homogeneously binds to dsDNA and ssDNA under tension, and forms condensates  
175 together with unpeeled ssDNA that is not under tension.

176

177

## 178 **FUS-ssDNA co-condensate formation is reversible**

179 In what follows, we set out to study if FUS-ssDNA co-condensates recapitulate typical  
180 dynamic properties of biomolecular condensates observed *in vivo*. We first investigated the  
181 reversibility of the formation of FUS-ssDNA co-condensates. To test if FUS-ssDNA co-  
182 condensates can be dissolved by the removal of ssDNA, we performed a repetitive stretch-relax  
183 experiment consisting of two subsequent overstretch-relaxation cycles. The approach was  
184 based on the rationale that overstretching progressively generates free and unpeeled ssDNA  
185 available for co-condensation, while relaxation progressively removes it. We first  
186 overstretched a DNA molecule in presence of 100 nM FUS, by increasing its extension from  
187 17 to 21  $\mu\text{m}$  at a speed of 0.1  $\mu\text{m/s}$ . The molecule was then relaxed again, followed by a second  
188 overstretch cycle. We recorded the spatiotemporal distribution of FUS along the entire  
189 molecule throughout the process (Figure 2A, Movie S2). In the example shown, we observed  
190 the formation of a condensate originating from a nick and a free terminal end on the right hand-  
191 side of the DNA molecule during the first overstretch. The size and brightness of condensates  
192 increased with progressive overstretching, in agreement with the findings presented in Figure

193 1B. During the subsequent relaxation cycle, the size and brightness of condensates decreased  
194 progressively until they completely disappeared. Notably, condensates formed at the precisely  
195 same locations and with essentially the same dynamics during the second overstretching cycle  
196 as they did during the first one. We conclude that FUS-ssDNA co-condensates can be dissolved  
197 by removal of available ssDNA.

198  
199 To study if FUS-ssDNA co-condensates can be dissolved by the removal of free FUS from the  
200 environment, we performed binding-unbinding experiments by first overstretching a DNA  
201 molecule to 20  $\mu\text{m}$  extension in absence of free FUS protein before moving it into ('binding'),  
202 out of ('unbinding') and again into ('re-binding') the FUS protein channel (Figure 2B). We  
203 observed that in the binding process and upon entering the protein channel with 100 nM FUS,  
204 co-condensates rapidly formed, with a time scale that was below the temporal resolution of our  
205 imaging setup (0.5 s). Condensate formation was less rapid at lower concentrations of FUS  
206 (Figure 2C). In the unbinding process and in absence of free FUS protein, the size and  
207 brightness of condensates decreased progressively. However, within 480 s of observation time  
208 they did not disappear completely. Notably, the intensity-time traces of condensate dissolution  
209 deviated from simple single-exponential behavior, indicating that multiple types of interaction  
210 might be involved in stabilization of FUS-ssDNA co-condensates (Figure 2D). Upon re-  
211 exposure to free FUS protein during re-binding, condensates rapidly assumed the same size  
212 and intensity they had assumed in the initial binding step. Taken together, we conclude that  
213 FUS-ssDNA co-condensates dissolve when either ssDNA or free FUS is removed. FUS-  
214 ssDNA co-condensates form reversibly, which a) is indicative of a significant amount of  
215 protein turnover in these condensates, b) demonstrates that FUS-ssDNA interactions are key  
216 for co-condensation and c) demonstrates that FUS-FUS interactions, if they exist in these co-  
217 condensates, are not sufficient for maintaining a condensate in absence of ssDNA.

218

### 219 **FUS-ssDNA co-condensates are viscous droplets with liquid-like properties**

220 Biomolecular condensates often show properties of liquid-like droplets *in vivo*. They deform  
221 under shear stress and can exhibit shape relaxation driven by surface tension (Brangwynne *et*  
222 *al.*, 2009; Jawerth *et al.*, 2018, 2020). We next investigated whether FUS-ssDNA co-  
223 condensates formed *in vitro* recapitulate this behavior. We first studied how these condensates  
224 react to the exertion of external mechanical perturbations. For that we increased the end-to-end  
225 distance of the DNA and hence the extend of overstretching in an abrupt and step-wise manner  
226 (steps every 10 s). This step-wise increase of the end-to-end distance within the overstretching  
227 regime instantaneously increases the amount ssDNA substrate available for co-condensate  
228 formation and causes the condensates to move with the propagating unpeeling front.

229

230 At 5 nM FUS, small FUS-ssDNA co-condensates emerged from the ends of the DNA molecule,  
231 which appear to instantaneously follow the propagation of unpeeling fronts (Figure 3A, left  
232 side). When increasing the amount of overstretch in a step-wise manner, condensates also grew  
233 in a step-wise fashion. This indicates that relaxation times are fast, and below the 1s interval  
234 between confocal image recordings. However, at 100 nM FUS, we observed that FUS-ssDNA  
235 co-condensates followed the step-wise bead movement with time delay and in a smooth,  
236 creeping-like manner, reminiscent of viscous droplet being dragged along a string (Figure 3A,  
237 right side, Movie S3). Leading and lagging edge of the condensates followed the bead  
238 movement on different response times, resulting in elongated condensate shapes. Elongated  
239 condensates relaxed towards more round shapes within the waiting time between steps (10s).  
240 This behavior is consistent with a viscoelastic response time of condensates associated with  
241 condensate viscosity and surface tension. We conclude that FUS-ssDNA co-condensates

242 formed at concentrations of ~100 nM FUS display viscous material properties and exhibit  
243 viscoelastic shape relaxation.

244  
245 We next set out to find additional signatures for viscoelastic shape relaxation of FUS-ssDNA  
246 co-condensates. To this end we investigated condensate shape changes after their formation.  
247 Figure 3B presents snapshots and the kymograph of a typical binding experiment performed at  
248 200 nM FUS, showing how FUS assembles on the different segments of the overstretched  
249 DNA molecule upon exposure to FUS. In the representative example shown, while the two  
250 small condensates (marked in blue and yellow) did not change their shape after formation, the  
251 big condensate (marked in red) transitioned from an initially elongated towards a round shape  
252 within ~20 s (Figure 3C). We conclude that FUS-ssDNA co-condensates display viscoelastic  
253 shape relaxations on a timescale that is of the order of 10 s. We have thus revealed two types  
254 of shape relaxation of FUS-ssDNA co-condensates consistent with liquid-like behavior: they  
255 deform upon external mechanical perturbations and they relax their shape after rapid formation.

256  
257 **FUS associating with ssDNA generates a sticky FUS-ssDNA polymer**

258 We speculate that FUS can form dynamic co-condensates with ssDNA because the association  
259 of FUS with ssDNA generates a self-interacting polymer which undergoes a globular collapse  
260 to form a liquid-like FUS-DNA co-condensate (Halperin and Goldbart, 2000; Polotsky *et al.*,  
261 2010; Cristofalo *et al.*, 2020). Here, FUS-FUS or additional FUS-DNA interactions could act  
262 like a ‘molecular glue’ when two FUS-coated ssDNA fragments meet, which would prevent  
263 their dissociation. To test if FUS-DNA indeed behaves like a sticky polymer, we overstretched  
264 single DNA molecules whose top strands were by chance nicked at certain locations. We refer  
265 to the single strand of the dsDNA molecule that remains physically attached to the two  
266 polystyrene beads as the “principal strand”, while the complementary strand which becomes  
267 progressively unpeeled during overstretching is referred to as the “top strand”. When a dsDNA  
268 molecule with a nicked top strand is overstretched to completeness (to 1.7 times its contour  
269 length), the unpeeled top strand fragments should dissociate and detach completely from the  
270 principal strand. We here tested if the interaction between FUS and ssDNA could interfere with  
271 this top strand detachment process.

272  
273 Figure 4A (left side) shows the kymograph of a typical stepwise overstretching experiment  
274 performed at 5 nM FUS. We observe ssDNA unpeeling and condensation of ssDNA fragments  
275 with FUS, originating from the two terminal ends of the DNA molecule and from two nicks.  
276 When two unpeeling fronts met, they fused and subsequently disappeared from the field of  
277 view. This indicates that the corresponding ssDNA top strand fragment completely detached  
278 from the principal strand. Notably, all three ssDNA top strand fragments dissociated from the  
279 principal strand, but the principal strand was still intact after dissociation of the last top strand  
280 fragments. However, in the example kymograph for the experiment performed at 100 nM FUS  
281 (Figure 4A, right side), the top strand fragments did not fall off after unpeeling fronts of the  
282 individual fragments met in the course of overstretching. Rather, the top strand fragments  
283 remained attached to the principal strand. Taken together, our observations are consistent with  
284 the picture that FUS-coated ssDNA behaves like a sticky polymer, which serves to hold isolated  
285 fragments of ssDNA attached to regions of dissociation.

286  
287 If self-interactions of the FUS-ssDNA polymer arise from FUS-FUS interactions, or from FUS-  
288 ssDNA interactions that are in addition to the normal mode of association of FUS to ssDNA,  
289 we would expect that these self-interactions depend on FUS concentration. We analyzed  
290 unpeeling events from experiments performed in the concentration range between 5 and

291 200 nM FUS, and classified them into “detached” (a top strand fragment disappeared from the  
292 principal strand when two corresponding unpeeling fronts met while the principal strand stayed  
293 intact) and “attached” (a top strand fragment remained attached to the principal strand when  
294 two corresponding unpeeling fronts met). We found that only for FUS concentrations below  
295 30 nM, a considerable fraction of unpeeled top strand fragments detached from the principal  
296 strand (Figure 4B), while they remained associated at higher concentrations. We conclude that  
297 self-interactions of the FUS-ssDNA polymer depend on FUS concentration. FUS-ssDNA co-  
298 condensate have liquid-like properties (see above). Capillary forces are mechanical forces that  
299 are generated by a fluid when contacting a surface (de Gennes, Brochard-Wyart and Quéré,  
300 2004; Quail *et al.*, 2020). Given that self-interactions of the FUS-ssDNA polymer can generate  
301 a liquid phase, it is tempting to speculate that this can give rise to generalized capillary forces  
302 for liquid phases consisting of collapsed self-interacting polymers. For FUS, these could arise  
303 when the liquid phase contacts other FUS-coated DNA strands, resulting in the continued  
304 adhesion of condensates with principal strands in the experiments described above, and  
305 delaying force induced disruption of dsDNA strands (Figure S3). It is tempting to speculate  
306 that these behaviors are related the ability of FUS-dsDNA interactions to act as a molecular  
307 glue in the context of the DNA damage response. This is interesting as one might expect that  
308 an immediate response to DNA damage requires prevention of DNA fragments from leaving  
309 the damage site.

310

311 So far, we have shown that FUS forms dynamic co-condensates with ssDNA and that these  
312 condensates show various properties that are also typical for protein-nucleic acid-based  
313 organelles observed *in vivo*: their formation is reversible, they exchange constituents with the  
314 environment and they show liquid-like material properties. Co-condensation also mediates  
315 stickiness and the adhesion of separate ssDNA strands. We next used the possibilities offered  
316 by our single molecule manipulation approach to reveal the physicochemical mechanisms  
317 underlying the formation of such FUS-ssDNA condensates.

318

### 319 **FUS-ssDNA co-condensation is based on FUS adsorbing in a single layer on ssDNA**

320 We were interested to understand if ssDNA in FUS-ssDNA condensates is coated with a single  
321 adsorption layers of FUS with every FUS molecule directly binding to ssDNA, or if multiple  
322 layers of FUS are present with some FUS molecules not directly bound to ssDNA. We first  
323 investigated how the size of FUS-ssDNA co-condensates depends on the number of  
324 incorporated nucleotides. For this we utilized the step-wise overstretching assay introduced in  
325 Figures 3 and 4. By controlling the end-to-end distance of the DNA molecule within the  
326 overstretching regime in a step-wise manner, we controlled the total number of unpeeled  
327 ssDNA nucleotides available for FUS-ssDNA co-condensate formation (Figure 5A). By  
328 utilizing nick-free DNA molecules only, we ensured that ssDNA unpeeling during  
329 overstretching only occurred from the two ends of the DNA molecules. By measuring the  
330 distance between each of the two forming condensates and the respective beads, and taking  
331 into account the length of a single nucleotide under the applied tension of around 65 pN  
332 (0.58 nm, (Smith, Cui and Bustamante, 1996; van Mameren *et al.*, 2009; Gross *et al.*, 2011)),  
333 we were able to determine the number of nucleotides available for incorporation into each of  
334 the two FUS-ssDNA co-condensates (see Experimental Procedures for details). Further, we  
335 determined the integrated FUS fluorescence intensity associated with each condensate.  
336 Notably, we calibrated the FUS fluorescence intensity to arrive at a number of FUS-EGFP  
337 molecules in the condensate, using a calibration procedure that relied on individual dCas9-  
338 EGFP molecules tightly bound to lambda phage DNA molecules (see Experimental Methods  
339 and Figure S4) (Morin *et al.*, 2020). We found that at all FUS concentrations investigated

340 (between 1 nM and 200 nM FUS), the number of FUS molecules in a condensate was  
341 proportional to the number of incorporated nucleotides, with a slope that depends on the FUS  
342 concentration (Figure 5B). This confirms that a) the number of FUS molecules in a FUS-  
343 ssDNA co-condensate is determined by the amount of available ssDNA substrate, and that b)  
344 co-condensate stoichiometry (*i.e.*, the ratio between number of proteins and number of  
345 nucleotides in a condensate) is independent of the size of the condensate, as is expected for co-  
346 condensation. More precisely, co-condensate stoichiometry is independent of the total number  
347 of ssDNA nucleotides in the co-condensate but depends on bulk FUS concentration (Figure  
348 5B). The ratio between the number of proteins and the number of nucleotides (nt) in a co-  
349 condensate (*i.e.*, the slopes of the relations in Figure 5B) informs about the degree of ssDNA  
350 substrate occupation by FUS. This ratio increased with increasing FUS concentrations between  
351 1 and 50 nM, and saturated at higher concentrations (Figure 5C). Strikingly, this saturation  
352 curve was well described by a simple Langmuir adsorption model ( $K_d = 31.5$  nM (11.3 - 51.8  
353 nM) (numbers in brackets indicate the lower and upper bound of the 95% confidence interval,  
354 unless otherwise noted), saturation level  $p_0 = 0.08$  molecules/nt (0.06 - 0.10 molecules/nt) for  
355 FUS-recruitment to ssDNA in FUS-ssDNA co-condensates). This model assumes that ligands  
356 occupy binding sites on the substrate independently and with negligible ligand-ligand  
357 interactions (Langmuir, 1918; Mitchison, 2020). Furthermore, the saturation level of the  
358 Langmuir adsorption curve (Figure 5C) implies a saturated density of FUS on ssDNA with  
359 approximately one FUS molecule every 12.4 nucleotides of ssDNA. Taken together, our data  
360 suggests that FUS in FUS-ssDNA co-condensates forms a single adsorption layer on ssDNA,  
361 with every FUS molecule directly bound to ssDNA. Binding occurs without detectable  
362 cooperativity despite the fact that FUS-FUS interactions within such a FUS-ssDNA co-  
363 condensate appear to collectively generate the capillary forces that drive co-condensation and  
364 condensate shape changes.

### 365 366 **FUS monolayer adsorption to dsDNA and LCD mediated interactions lead to FUS-dsDNA co-** 367 **condensate formation**

368 Given that FUS does not only have an affinity for single- but also for double-stranded DNA  
369 (Figure 1C), we next investigated whether FUS can also form co-condensates with dsDNA.  
370 For this, we attached a single dsDNA molecule to a Streptavidin-coated bead held in an optical  
371 trap and applied an external buffer flow to stretch the DNA. We then moved the stretched bead-  
372 DNA construct to a channel containing 100 nM FUS while the flow was maintained (Figure  
373 6A). When moving the flow-stretched dsDNA molecule into the protein channel, we observed  
374 that a) the dsDNA molecule became immediately coated with FUS (Figure 6B, Movie S4) and  
375 b) a co-condensate appeared to form at the free end of the dsDNA molecule, rapidly moving  
376 towards the bead and increasing in size with decreasing distance to the bead. Co-condensation  
377 was abolished when the low-complexity domain of FUS was not present (Figure 6C),  
378 indicating that, as expected, the low-complexity domain plays a role in mediating the FUS-  
379 FUS interactions necessary for co-condensation of FUS with dsDNA. Together, this provides  
380 evidence that the interaction of FUS with dsDNA leads to the formation of a FUS-dsDNA co-  
381 condensate even in presence of DNA tension.

382  
383 To better investigate the co-condensation process, we next attached a dsDNA molecule to two  
384 beads held in place in optical traps, and repeatedly relaxed and stretched the molecule between  
385 8  $\mu$ m and 16  $\mu$ m end-to-end distance and thus to a length slightly below its contour length in a  
386 solution containing 200 nM FUS (Figure 6D). Again, we observed that FUS assembled  
387 homogeneously on the stretched dsDNA molecule (Figure 6E, Movie S5). Strikingly, a single  
388 FUS-DNA co-condensate emerged when the DNA was relaxed to an end-to-end distance below  
389  $\sim 14$   $\mu$ m, which grew in FUS amount with decreasing DNA end-to-end distance. The



390 condensate dissolved again when the DNA was stretched beyond  $\sim 14 \mu\text{m}$ , and it re-formed  
391 with similar dynamics when the DNA was relaxed again, albeit at a slightly different position.  
392 Again, condensate formation depended on the presence of the low-complexity domain of FUS  
393 (Figure 6F). To conclude, FUS can form dynamic, reversible co-condensates with relaxed  
394 dsDNA.

395  
396 We next asked whether these FUS-dsDNA co-condensates indeed form a separate physical  
397 phase. We draw an analogy to the phase transition between liquid water and vapor (Atkins, de  
398 Paula and Keeler, 2017) when a pot of water is put onto a hot stove, the temperature of the  
399 water will not surpass  $100^\circ\text{C}$ . Instead of increasing the temperature, energy input will cause  
400 water to transition from the liquid phase to the vapor phase while the temperature remains  
401 constant. This analogy is helpful for understanding the dissolution of FUS-dsDNA co-  
402 condensates by mechanically extracting FUS coated dsDNA from the condensate. We predict  
403 two effects to occur when the end-to-end distance of a FUS coated, condensed dsDNA  
404 molecule is increased. First, mass conservation implies that as FUS coated DNA is  
405 progressively extracted from the condensate, the amount of material in the FUS-dsDNA co-  
406 condensate should decrease by corresponding amounts. Second, the dissolution of FUS-  
407 dsDNA co-condensates should occur at a constant DNA tension, similar to the constant  
408 temperature observed for the transition between liquid and gaseous water (Cristofalo *et al.*,  
409 2020; Quail *et al.*, 2020).

410  
411 To test the first prediction, we used the dual-trap experiment to form and dissolve FUS-dsDNA  
412 co-condensates at 50 and 200 nM FUS. Mass conservation implies that the number of FUS  
413 molecules inside a condensate increases proportionally with the amount of co-condensing  
414 dsDNA. In other words, the amount of FUS in the co-condensate should increase linearly with  
415 decreasing DNA end-to-end distance, which is what we observed (Figure 6G). Furthermore,  
416 the absolute value of the slope of the linear relationship between number of FUS molecules in  
417 a co-condensate and the DNA end-to-end distance increased with increasing FUS concentration  
418 (Figure 6G). At 50 nM FUS,  $\sim 114$  FUS molecules are bound per  $\mu\text{m}$  of DNA in a co-  
419 condensate (corresponding to a spacing of one FUS molecule every  $\sim 26$  bp), while at 200 nM  
420 FUS  $\sim 150$  FUS molecules are bound per  $\mu\text{m}$  of DNA in a co-condensate (corresponding to a  
421 spacing of one FUS molecule every  $\sim 20$  bp) (also see Figure S2). This reveals that FUS adsorbs  
422 in a single layer on DNA at both concentrations investigated, with enough space between FUS  
423 molecules to allow each FUS molecule to directly bind to dsDNA. An analysis of the  
424 probability for co-condensate formation as a function of DNA end-to-end distance revealed a  
425 sharp transition at  $10.5 \mu\text{m}$  ( $10.4 \mu\text{m} - 10.6 \mu\text{m}$ ) at 50 nM FUS and  $12.9 \mu\text{m}$  ( $12.7 \mu\text{m} - 13.1$   
426  $\mu\text{m}$ ) at 200 nM FUS (Figure S5D). This indicates that co-condensation occurs below a critical  
427 DNA end-to-end distance  $L_{crit}$  that depends on FUS concentration. Taken together, we  
428 conclude that as FUS coated DNA is progressively extracted from the FUS-dsDNA co-  
429 condensate, the amount of material in the FUS-dsDNA co-condensate decreases by  
430 corresponding amounts.

431  
432 We next tested the second prediction and investigated the range of DNA tensions at which  
433 FUS-dsDNA co-condensates form (Figure 6H and Figure S5G). Using the dual trap tweezer  
434 assay we found that as FUS-coated dsDNA is relaxed starting from an initially stretched  
435 configuration ( $16 \mu\text{m}$  end-to-end distance), the relation between force and DNA end-to-end  
436 distance follows the expected Worm-like Chain (WLC) behavior as long as its end-to-end  
437 distance is above  $L_{crit}$ . Strikingly, when the end-to-end distance was reduced below  $L_{crit}$  (and  
438 hence when a condensate forms), trap force remained constant ( $0.19 \pm 0.05$  pN at 50 nM FUS,  
439  $0.71 \pm 0.05$  pN at 200 nM FUS (mean  $\pm$  STD)). Furthermore, condensates of various sizes

440 coexisted at essentially the same DNA tension (Figure S5G). Note also that in the region where  
441 the WLC transitions into the constant force regime a slight dip in force was observed, indicative  
442 of a small but finite surface tension of the condensate. A theoretical description of protein-  
443 DNA co-condensation in the optical trap suggests that this dip corresponds to a surface tension  
444 of the order of  $0.15 \text{ pN}/\mu\text{m}$  (Figure S5F and supplementary experimental procedures).  
445 Together, this provides evidence that a first-order phase transition underlies the formation of  
446 FUS-dsDNA co-condensates.

447  
448 We next set out to estimate the condensation free energy per FUS molecule (Quail *et al.*, 2020).  
449 At DNA end-to-end distances far below the critical DNA length and in the case of low surface  
450 tension, the constant force generated by the co-condensate reeling in DNA is determined by  
451 the condensation free energy per volume  $\mu$  and the DNA packing factor  $\alpha$ . The packing factor  
452 is a measure for the scaling between length of condensed DNA and the volume of the  
453 condensate. We estimated  $\alpha$  using the FUS concentration dependent FUS coverage of dsDNA  
454 inside condensates (slope in Figures 6G and S5E) and the molecular volume of FUS inside  
455 condensates  $V_m$  (Figure S5F). We found that values of  $\alpha$  ( $\sim 0.05 \mu\text{m}^2$  at 50 nM FUS,  $\sim 0.06$   
456  $\mu\text{m}^2$  at 200 nM FUS) were similar in magnitude to those reported for a DNA-protein phase  
457 containing the transcription factor FoxA1 (Quail *et al.*, 2020). The condensation free energy  
458 per volume obtained using the packing factors and corresponding critical forces was  
459  $\sim 4.1 \text{ pN}/\mu\text{m}^2$  at 50 nM FUS and  $\sim 11.9 \text{ pN}/\mu\text{m}^2$  at 200 nM FUS. With a FUS density inside  
460 condensates of about  $2500 \text{ molecules}/\mu\text{m}^3$  (specified by the molecular Volume  $V_m$ ), this  
461 provides an estimate of the condensation free energies of  $\sim 0.4 \text{ kT}/\text{FUS}$  at 50 nM FUS and  
462  $\sim 1.1 \text{ kT}/\text{FUS}$  at 200 nM FUS. Taken together, FUS adsorbing in a single layer on DNA  
463 effectively generates a sticky FUS-DNA polymer that can collapse to form a liquid-like FUS-  
464 DNA co-condensate. For double-stranded DNA, this condensation occurs at constant DNA  
465 tension which is a clear signature of a mesoscopic first-order phase transition.

466  
467 We next set out to test if single layer adsorbed FUS can mediate adhesion of separate dsDNA  
468 strands. For that we attached two FUS-coated dsDNA strands to three beads in an L-like  
469 configuration, with DNA strands held at tensions above the critical tension for FUS-dsDNA  
470 condensate formation (Figure 6I). By moving one of the beads relative to the others, we were  
471 able to bring the two FUS-coated dsDNA molecules in close proximity in order to test if they  
472 adhere to each other. We found that the two FUS-coated dsDNA strands adhered to each other  
473 and “zippered up” at 100 nM FUS (Figure 6J, Movie S6). Zippering was reversed by pulling  
474 the DNA strands away from each other and re-established by moving DNA strands closer.  
475 Furthermore, zippering depends on the presence of the low-complexity domain (Figure 6H).  
476 Taken together, our data indicates that a single layer of FUS attached to DNA can mediate  
477 dynamic adhesion of separate DNA strands, opening up the possibility for this mechanism to  
478 be involved in long-range genome organization.

479

## 480 Discussion

481 The discovery that membrane-less compartments can be formed by liquid-like biomolecular  
482 condensates and that phase separation can contribute to the spatiotemporal organization of  
483 intracellular biochemistry has opened up new perspectives in cell biology (Hyman, Weber and  
484 Jülicher, 2014; Banani *et al.*, 2017). Here, we have demonstrated that FUS molecules can  
485 adsorb in a single layer on DNA, which is well described by a Langmuir isotherm (Figures 5  
486 and S2). At low dsDNA tension, self-interactions between FUS molecules facilitate co-  
487 condensation and formation of FUS-DNA co-condensates (Figure 6). Here, changing dsDNA  
488 extension shifts the balance between the co-condensate and the FUS-coated dsDNA molecule,

489 and results in the co-condensate growing at the expense of stretched dsDNA. The process of  
490 co-condensation is a chemo-mechanical process that converts chemical potential changes to  
491 mechanical forces. These generalized capillary forces can exert tension on the DNA that  
492 remains outside the condensate. Growth of co-condensates occurs at constant DNA tension,  
493 consistent with a mesoscopic first order phase transition as is expected for a physical  
494 condensation process. We find that the constant tension depends on the FUS concentration and  
495 is of the order of 1 pN. For comparison, forces required for unfolding individual proteins  
496 typically are higher and in the range of tens of pN (Gupta *et al.*, 2016; Ganim and Rief, 2017;  
497 sen Mojumdar *et al.*, 2017). Also, the stall force of RNA Pol II is at least an order of magnitude  
498 higher, opening up the possibility that transcription can proceed essentially unhindered in the  
499 presence of such capillary forces (Yin *et al.*, 1995). Protein-DNA co-condensation involves the  
500 collective binding of many proteins to a DNA substrate. Here we demonstrate that upon single-  
501 layer binding the FUS coated DNA molecule undergoes co-condensation. In other scenarios,  
502 interactions of protein ligands and DNA surfaces could lead to multilayer-adsorption  
503 (Mitchison, 2020), or the formation of protein microphases via prewetting transitions (Morin  
504 *et al.*, 2020) (Figure S1).

505  
506 We speculate that the mechanism we describe here is relevant for other processes of DNA  
507 compaction, such as heterochromatin formation driven by HP1 $\alpha$  (Larson *et al.*, 2017; Strom *et al.*,  
508 2017; Larson and Narlikar, 2018; Sanulli *et al.*, 2019; Keenen *et al.*, 2021). We further  
509 suggest that generalized capillary forces arising in liquid-like co-condensates play an important  
510 role in other biological processes such as the transcription-dependent organization of chromatin  
511 (Cho *et al.*, 2018; Sabari *et al.*, 2018; Thompson *et al.*, 2018; Henninger *et al.*, 2021) (Figure  
512 S6A), the formation of viral replication compartments (Schmid *et al.*, 2014; Heinrich *et al.*,  
513 2018; McSwiggen *et al.*, 2019; Nevers *et al.*, 2020) (Figure S6C), and the DNA damage  
514 response (Altmeyer *et al.*, 2015; Aleksandrov *et al.*, 2018; Naumann *et al.*, 2018; Levone *et al.*,  
515 2021) (Figure S6B). With respect to the latter, we have shown that pairs of FUS-coated  
516 DNA can bind together and exert adhesion forces onto each other (Figures 4 and 6) It is possible  
517 that inside the cell, such adhesion forces prevent DNA fragments to leave damage sites during  
518 DNA repair. An interesting question for future research is to understand if poly(ADP)ribose  
519 (PAR) triggers FUS-DNA co-condensation at the damage site, thereby preventing the escape  
520 of DNA damage fragments. Taken together, we suggest protein-nucleic acid co-condensation  
521 constitutes a general mechanism for forming intracellular compartments.

522

## 523 **Acknowledgments**

524 We thank members of the S.W.G lab for fruitful discussion. S.W.G. was supported by the DFG  
525 (SPP 1782, GSC 97, GR 3271/2, GR 3271/3, GR 3271/4) and the European Research Council  
526 (grant 742712). R.R. and A.H. acknowledge support by the NOMIS foundation. A.H. is  
527 supported by the Hermann und Lilly-Schilling Stiftung für medizinische Forschung im  
528 Stifterverband. We thank Stefan Golfier for contributing the sgRNA and dCas9-EGFP for  
529 single molecule intensity quantification experiments. We further acknowledge K.M. Crell, S.  
530 Kaufmann and F. Thonwart for providing reagents. We also thank J. Brugues, A. Gladfelder,  
531 A. Hyman, T. Mitchison, W. Snead and T. Quail for discussions and critical comments on the  
532 manuscript.

533

534

## 535 Figures

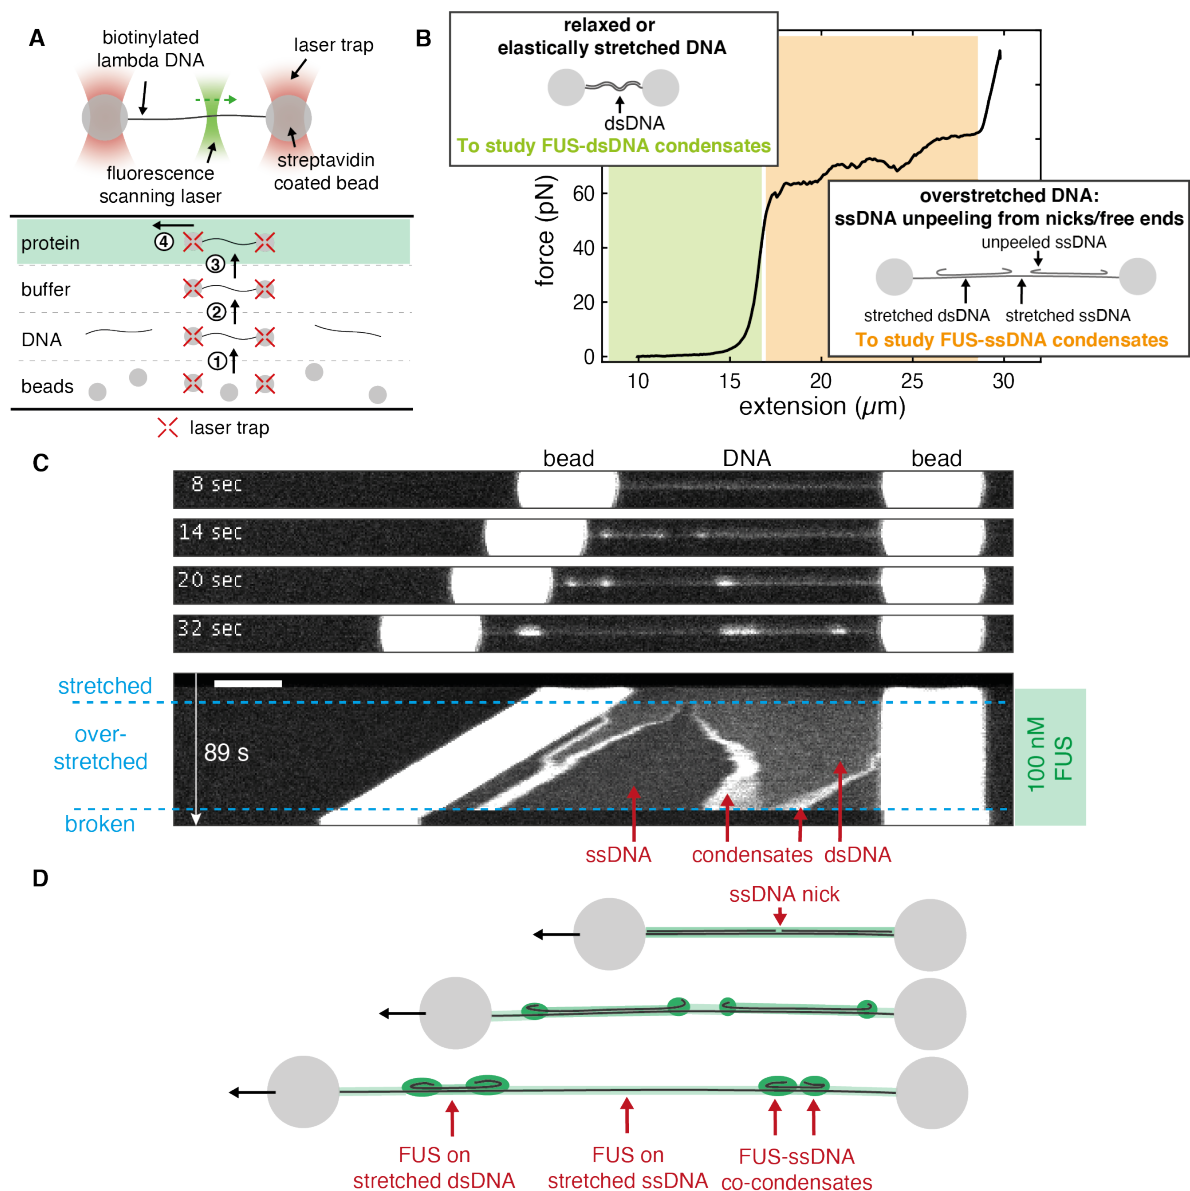

536  
537

### Figure 1. FUS forms co-condensates with ssDNA

538 (A) Schematics depicting the assembly and geometry of the optical tweezers-based assay. Lambda  
539 phage DNA is attached to Streptavidin-coated polystyrene beads held in optical traps. Binding of  
540 fluorescent FUS to DNA is recorded using scanning confocal fluorescence microscopy. Experiments  
541 are performed in a microfluidics flow chamber providing four separate experimental conditions via  
542 laminar flow fields. Steps for setting up the experiment in the flow chamber: (1) optical trapping of two  
543 Streptavidin coated polystyrene beads, (2) catching of a lambda phage DNA molecule that is  
544 biotinylated at its termini, (3) testing whether the tether is a single DNA molecule, (4) mechanical  
545 manipulation of the DNA in presence of FUS.  
546 (B) DNA mechanics and structure underlying our approach to study formation of FUS-ssDNA and  
547 FUS-dsDNA condensates. Investigation of FUS-dsDNA condensates is based on relaxed DNA.  
548 Investigation of FUS-ssDNA condensates is based on the gradual generation of unpeeled ssDNA during  
549 DNA overstretching. See also Movie S1  
550 (C) Snap shots and kymograph showing FUS-DNA interaction and FUS-ssDNA condensate formation  
551 during overstretching of DNA at 100 nM FUS. Scale bar: 4  $\mu\text{m}$ .

552 (D) Schematics depicting DNA overstretching in presence of FUS. FUS homogeneously coats stretched  
553 ssDNA and dsDNA and forms condensates with unpeeled relaxed ssDNA.  
554

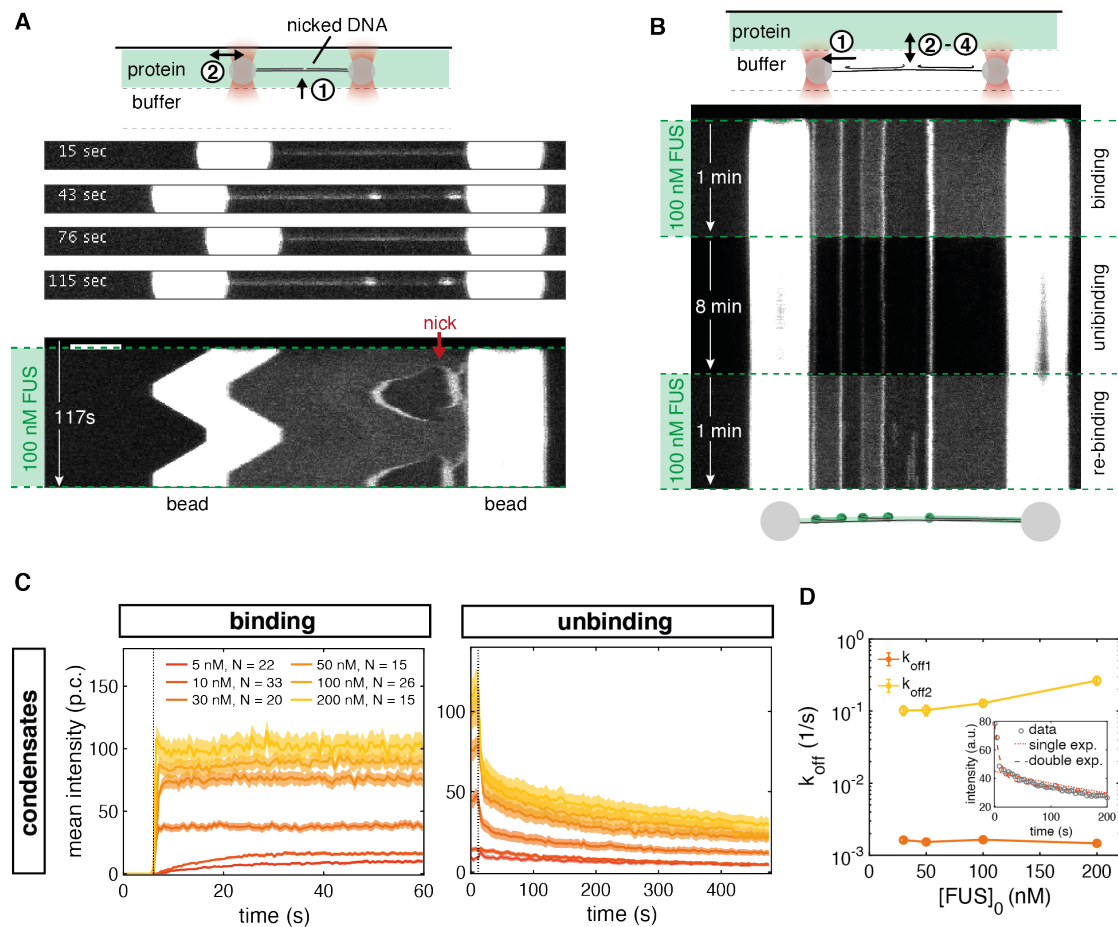

555  
556

## Figure 2. FUS-ssDNA co-condensate formation is reversible

557 (A) Snap shots and kymograph of repetitive overstretching experiments showing reversibility of  
558 condensate formation with respect to availability of a ssDNA scaffold. Scale bar: 4  $\mu$ m. See also Movie  
559 S2

560 (B) Representative kymograph showing reversibility of FUS-ssDNA condensate formation with respect  
561 to availability of FUS tested in buffer exchange experiments. Condensates formed rapidly upon  
562 exposure of overstretched DNA to 100 nM FUS, slowly dissolved upon removal of free protein and  
563 rapidly re-formed upon re-exposure to free FUS.

564 (C) Intensity-time traces of FUS-ssDNA condensates at different FUS concentrations during the binding  
565 and the unbinding step of the buffer exchange experiment; p.c. denotes the photon count. Plotted: mean  
566  $\pm$  STD.

567 (D) Analysis of unbinding rates for condensates formed at different initial FUS concentrations. Inset:  
568 Intensity-time traces fitted with single and double exponentials. Fitting of intensity-time traces with  
569 double exponentials yielded 2 typical unbinding time scales in the range of seconds and hundreds of  
570 seconds, indicating at least 2 different interaction modes of FUS involved in FUS-ssDNA condensate  
571 formation. Error bars: 95 % confidence intervals.

572

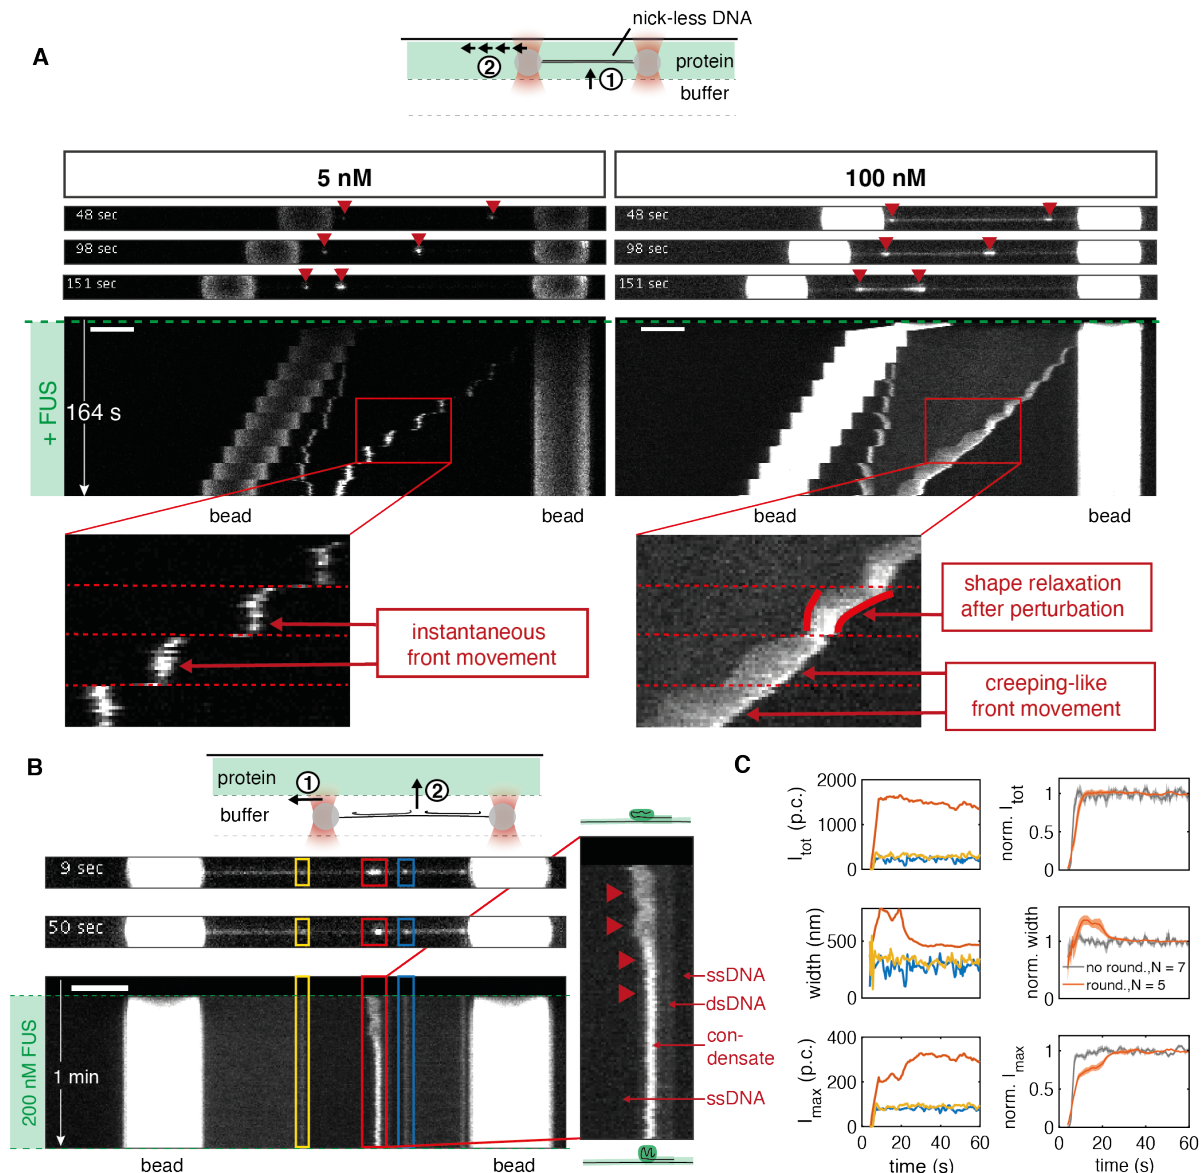

573  
574

### Figure 3. FUS-ssDNA co-condensates are viscous droplets with liquid-like properties

575 (A) Representative snap shots and kymographs of FUS on DNA molecules overstretched in a step-wise  
576 manner in presence of different FUS concentrations. At 5 nM FUS, condensates had a point-like  
577 morphology and instantaneously grew and moved along the DNA when the DNA end-to-end distance  
578 was increased (left side, zoom). At 100 nM FUS, condensates grew and moved along the DNA in a  
579 creeping-like manner when the DNA end-to-end distance was increased. They elongated and showed  
580 shape relaxations on slow time scales compared to the fast-imposed external perturbations, reminiscent  
581 of viscous, liquid-like droplets (right side, zoom).

582 (B) Representative snap shots and kymographs of a binding experiment performed at 200 nM FUS.  
583 Occasional shape changes from an initial elongated to a rounded morphology were observed (red  
584 condensate and zoom).

585 (C) Left side: quantification of shape changes of the example condensates. From top to bottom: total  
586 intensity, width and maximum intensity of individual condensates over time. While the total intensity  
587 of the red condensate remained constant over the course of the experiment, its width decreased while  
588 its maximum intensity increased until they levelled off. Right side: quantification of shape changes of  
589 condensate ensemble. From top to bottom: normalized total intensity, normalized width and normalized  
590 maximum intensity of condensates over time. At 200 nM FUS, 5 out of 12 condensates showed  
591 rounding, decreasing their width to 70 % of their initial with and increasing their maximum intensity to

592 140 % of their initial intensity while keeping their total intensity constant within about 20 s. Traces  
593 show mean  $\pm$  SEM, p.c. denotes the photon count.



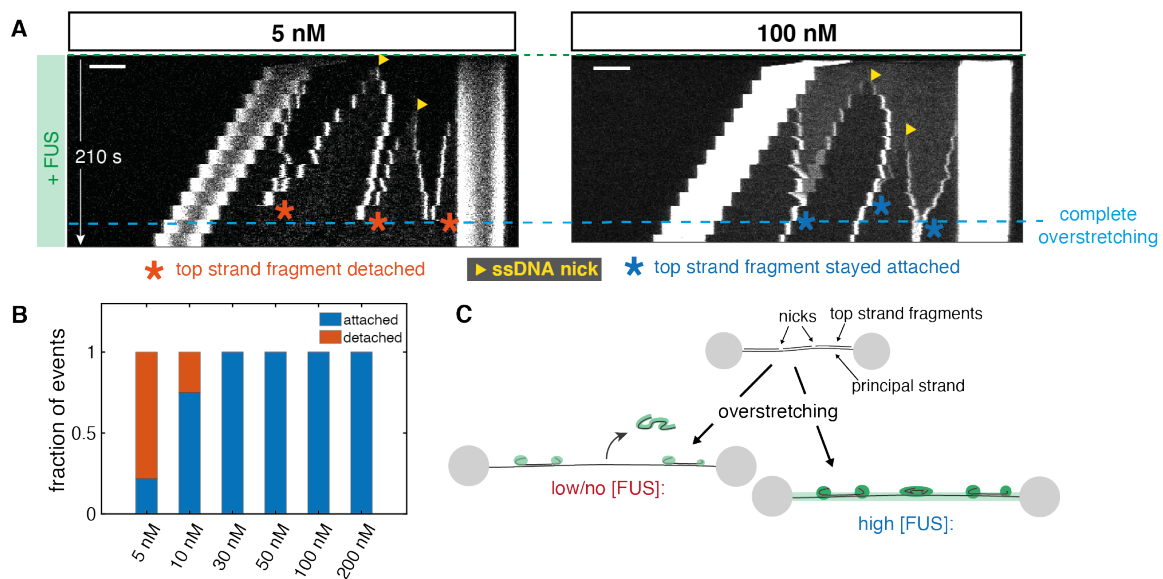

594  
595

#### Figure 4. FUS associated with ssDNA generates a sticky FUS-ssDNA polymer

596 (A) Representative kymographs showing the influence of FUS-ssDNA interaction on the dissociation  
597 of DNA fragments when the DNA molecules are overstretched. The principal strand is the single strand  
598 of the dsDNA molecule attached to the beads. At 5 nM FUS, fragments generated by overstretching  
599 detached from the principal strand while at 100 nM FUS, fragments stayed attached to the principal  
600 strand. Scale bar: 4  $\mu$ m

601 (B) Quantification of the fraction of fragments that detached from the principal strand vs. the fraction  
602 of fragments that stayed attached in step-wise overstretching experiments. Only at 5 and 10 nM FUS,  
603 fragments were able to detach from the principal strand, while FUS-ssDNA condensates formed at  
604 higher FUS concentrations always stayed attached. Number of events: 5 nM: 23, 10 nM: 16, 30 nM:  
605 14, 50 nM: 7, 100 nM: 23, 200 nM: 18.

606 (C) Illustration of the fragment detachment/attachment process.

607  
608

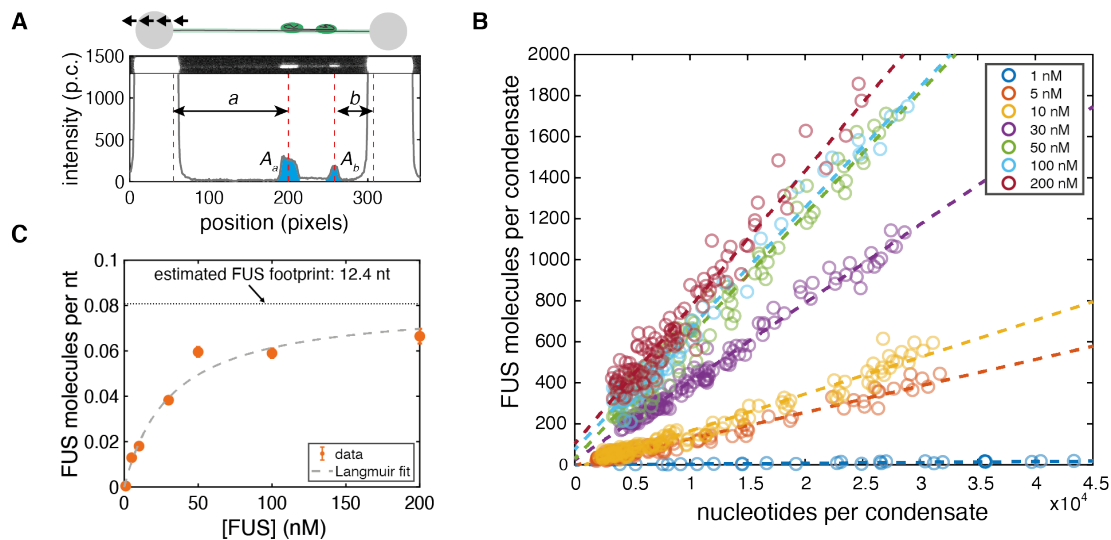

609  
610

**Figure 5. FUS-ssDNA co-condensation is based on FUS adsorbing in a single layer on ssDNA**

611 (A) Intensity of FUS-ssDNA condensates and the number of potentially incorporated nucleotides were  
 612 extracted from step-wise overstretching experiments (p.c. denotes photon count).  $A_a$  and  $A_b$  are  
 613 integrated intensities of condensates,  $a$  and  $b$  are the pieces of ssDNA incorporated in each of them.  
 614 (B) Number of FUS molecules vs. number of nucleotides incorporated in each condensate. Number of  
 615 events: 1 nM: 25, 5 nM: 72, 10 nM: 68, 30 nM: 69, 50 nM: 47, 100 nM: 38, 200 nM: 59. An event is a  
 616 single condensate observed during a single stretching step in a step-wise overstretching experiment.  
 617 Dashed lines: linear fits to data points at the corresponding FUS concentration. Intensities were  
 618 converted into numbers of FUS molecules by calibration with single dCas9-GFP molecules (Figure S4).  
 619 (C) Number of FUS molecules per nucleotide in condensates vs. FUS concentration obtained from  
 620 linear fitting in (B). Data is fitted by a Langmuir binding isotherm, implying that the Langmuir-like  
 621 recruitment of a monolayer of FUS to ssDNA underlies FUS-ssDNA condensate formation. The  
 622 saturation value of the curve (dotted horizontal line) indicates a footprint of the FUS molecule inside  
 623 FUS-ssDNA condensates of 12.4 nucleotides. Plotted: orange: result of linear fitting in (B) within 95 %  
 624 confidence intervals. Grey dashed lines: Langmuir fit.  
 625

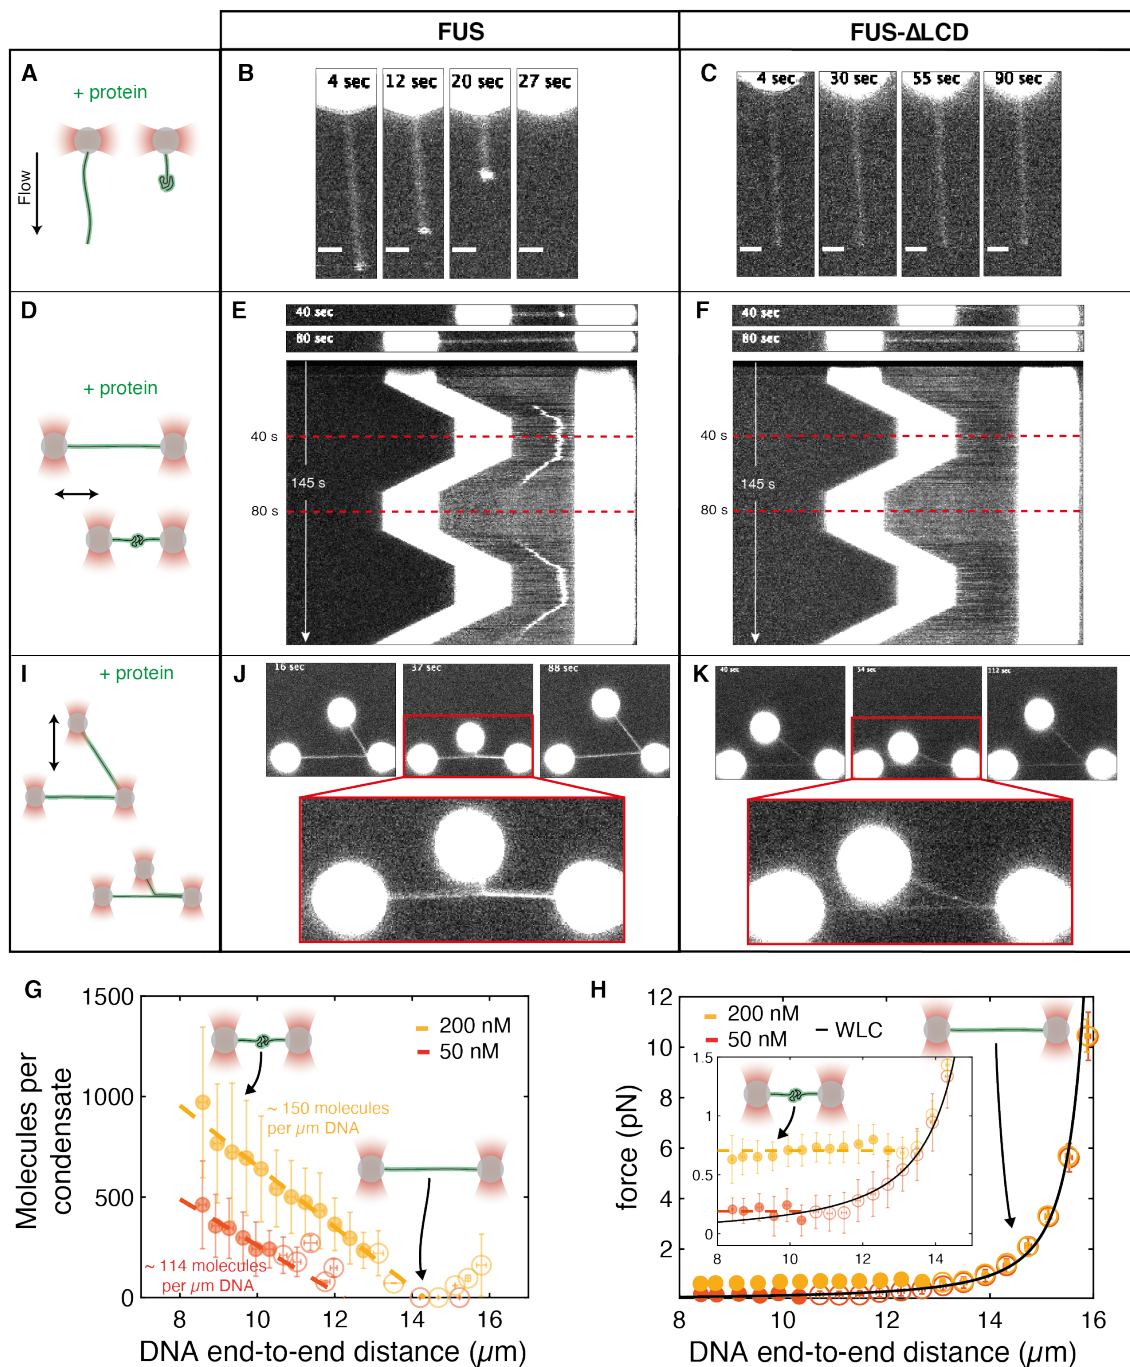

626  
627  
628

**Figure 6. FUS monolayer adsorption on dsDNA and low-complexity domain mediated interactions lead to FUS-dsDNA co-condensate formation**

629 Representative snap shots and kymographs of FUS-dsDNA interaction assessed in 3 optical tweezers-  
630 based assays.

631 (A) Individual dsDNA molecules were attached via one end to trapped beads and stretched by flow in  
632 presence of protein.

633 (B) FUS homogeneously adsorbs on and condenses hydrodynamically stretched dsDNA.

634 (C) FUS with deleted low-complexity domain (FUS $\Delta$ LCD) homogeneously binds to hydrodynamically  
635 stretched dsDNA, but does not mediate condensation.

636 (D) dsDNA attached to two trapped beads via both ends was stretched and relaxed between 8 and 16  
637  $\mu\text{m}$  end-to-end distance in presence of protein.

638 (E) FUS forms reversible condensates with relaxed dsDNA.

639 (F) FUS $\Delta$ LCD homogeneously binds to dsDNA, but does not mediate condensation.

640 (G) Number of FUS molecules in FUS-dsDNA condensates vs. DNA end-to-end distance studied in  
641 dual-trap optical tweezers experiments. Data was obtained from tracking the condensate intensity and  
642 DNA end-to-end distance during the initial relaxation from 16 to 8  $\mu\text{m}$  DNA extension. Number of FUS  
643 molecules inside condensates was estimated from condensate intensity using the calibration procedure  
644 described in Figure S4. Number of FUS molecules inside condensates linearly increases with decreasing  
645 DNA end-to-end distance, while the slope of this increase depends on the FUS concentration and hence  
646 on the FUS coverage of dsDNA. Condensate formation only occurs below a critical, FUS concentration  
647 dependent DNA end-to-end distance  $L_{crit}$  (see Figure S5D). Red: condensates formed at 50 nM FUS (29  
648 individual DNA molecules); yellow: condensates formed at 200 nM FUS (22 individual DNA  
649 molecules). Filled circles: data points classified as ‘condensate’; open circles: data points classified as  
650 ‘no condensate’ (classification with respect to  $L_{crit}$ ). Mean  $\pm$  STD. Dashed lines: linear fits indicating  
651 the linear increase of condensate size with decreasing DNA end-to-end distance.  
652 (H) DNA tension vs. DNA end-to-end distance measured in dual trap experiments. When DNA is  
653 relaxed in presence of FUS starting from 16  $\mu\text{m}$  end-to-end distance, the measured relationship between  
654 force and DNA end-to-end distance coincides with the one of ‘naked’ DNA (black line, Worm-like  
655 Chain model (WLC)). Below the critical DNA end-to-end distance, the force remains constant when  
656 the end-to-end distance is reduced further. Red: condensates formed at 50 nM FUS (29 individual DNA  
657 molecules); yellow: condensates formed at 200 nM FUS (22 individual DNA molecules). Filled circles:  
658 data points classified as ‘condensate’; open circles: data points classified as ‘no condensate’  
659 (classification with respect to  $L_{crit}$ ). Mean  $\pm$  STD. Dashed lines: linear fits indicating the force buffering  
660 by condensates when DNA end-to-end distance is decreased.  
661 (I) Two dsDNA molecules were attached to three trapped beads in an L-like configuration. One bead  
662 was moved to approach the molecules and hence to allow for protein mediated DNA zippering.  
663 (J) FUS mediates capillary-like forces between dsDNA strands.  
664 (K) DNA zippering is lost by deletion of the FUS LCD.  
665 Scale bars: (B), (C): 2  $\mu\text{m}$ ; (E), (F), (J), (K): bead diameter 4  $\mu\text{m}$   
666

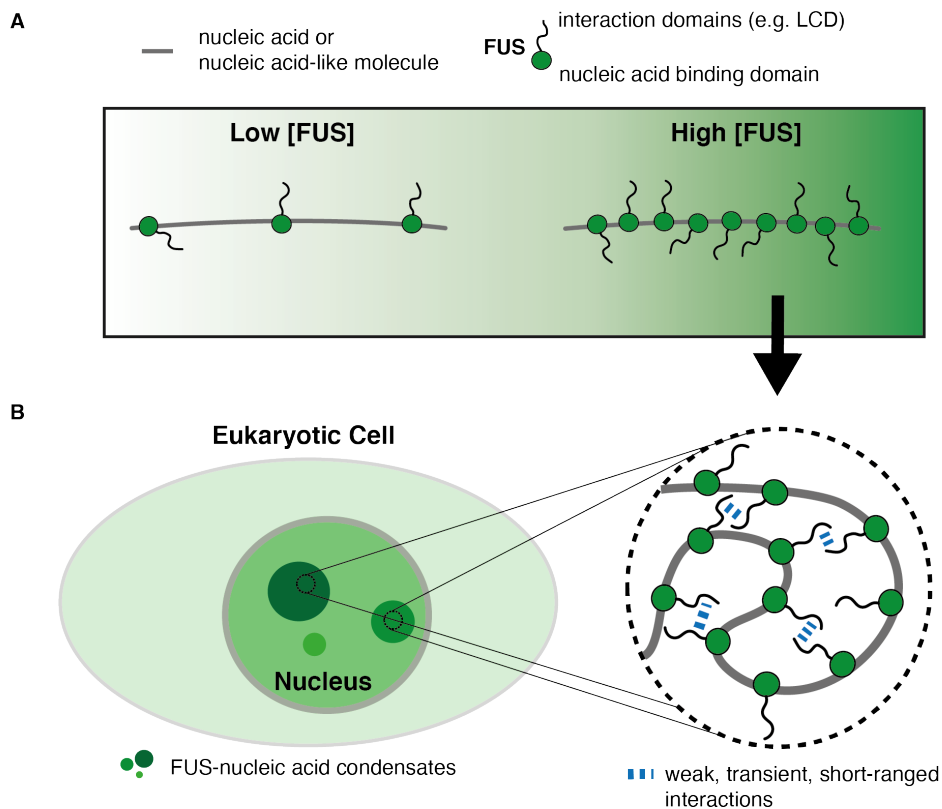

667  
668  
669

**Figure 7. Biomolecular condensate formation based on monolayer protein recruitment to nucleic acids**

670 (A) Nucleic acids or nucleic acid-like polymers recruit monolayers of proteins.  
671 (B) Protein adsorption on nucleic acids gives rise to an effective self-interacting protein-nucleic acid  
672 polymer. Collapse of this self-interacting polymer leads to the formation of protein-nucleic acid co-  
673 condensates reminiscent of biomolecular condensates observed in cell nuclei.  
674  
675  
676

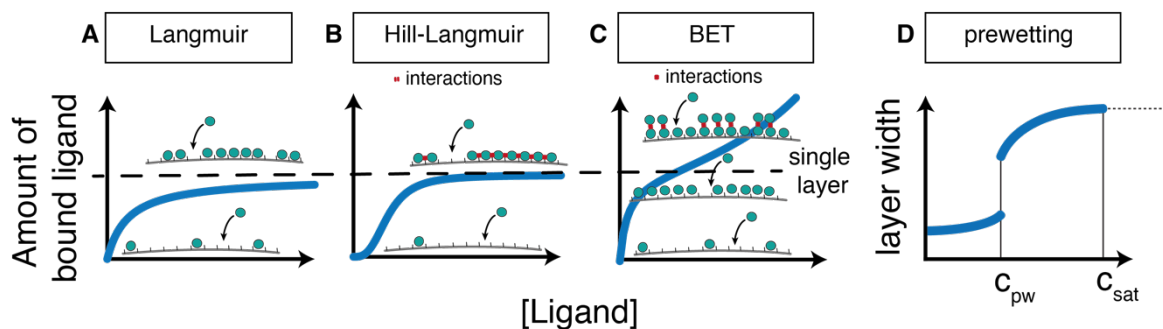

677  
678

**Figure S1. Ligand adsorption on substrates**

679 The type of adsorption of ligands on a substrate depends in the relative strengths of ligand-ligand and  
680 ligand-substrate interactions.

681 (A) If ligand-ligand interactions are negligible, the ligands form a single layer on the substrate, with a  
682 lattice site occupancy that increases with increasing ligand concentration and approaches saturation at  
683 high ligand concentrations (Langmuir model).  
684 (B) In presence of cooperative ligand-ligand interactions that support association with the substrate, the  
685 ligand occupancy of the scaffold follows a switch-like, sigmoidal trend. Increase of ligand concentration  
686 results in the formation of a single ligand layer on the scaffold (Hill-Langmuir model).  
687 (C) In presence of attractive ligand-ligand interactions, association of ligands to a substrate can be  
688 described using the BET model. Increase in ligand concentration first leads to the formation of a single  
689 protein layer on the substrate and later to the formation of multiple layers of ligands on top of the initial  
690 layer. In contrast to the Langmuir and Hill-Langmuir model, ligand binding to the scaffold is non-  
691 saturable under this condition.  
692 (D) The prewetting model is a continuum-description of adsorption of ligands with ligand-ligand  
693 interactions on a substrate. Below the so-called prewetting concentration of ligands, ligands form a thin  
694 layer in the substrate. Above the prewetting concentration, a thick layer of ligands on the substrate is  
695 formed. Above the saturation concentration for bulk phase separation of ligands, the layer thickness  
696 does not increase anymore.  
697

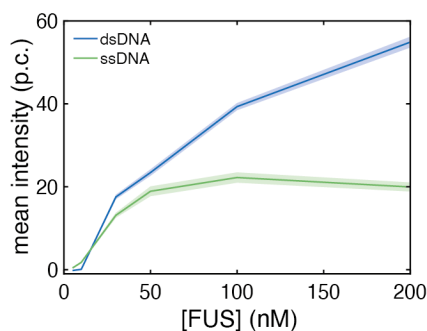

698 **Figure S2. FUS adsorption on stretched DNA is saturable**  
699

700 Equilibrium intensity of FUS on stretched dsDNA (blue) and stretched ssDNA (green) obtained from  
701 binding experiments performed with overstretched DNA at FUS concentrations between 5 and 200 nM  
702 (p.c.: photon count; mean  $\pm$  SEM)  
703

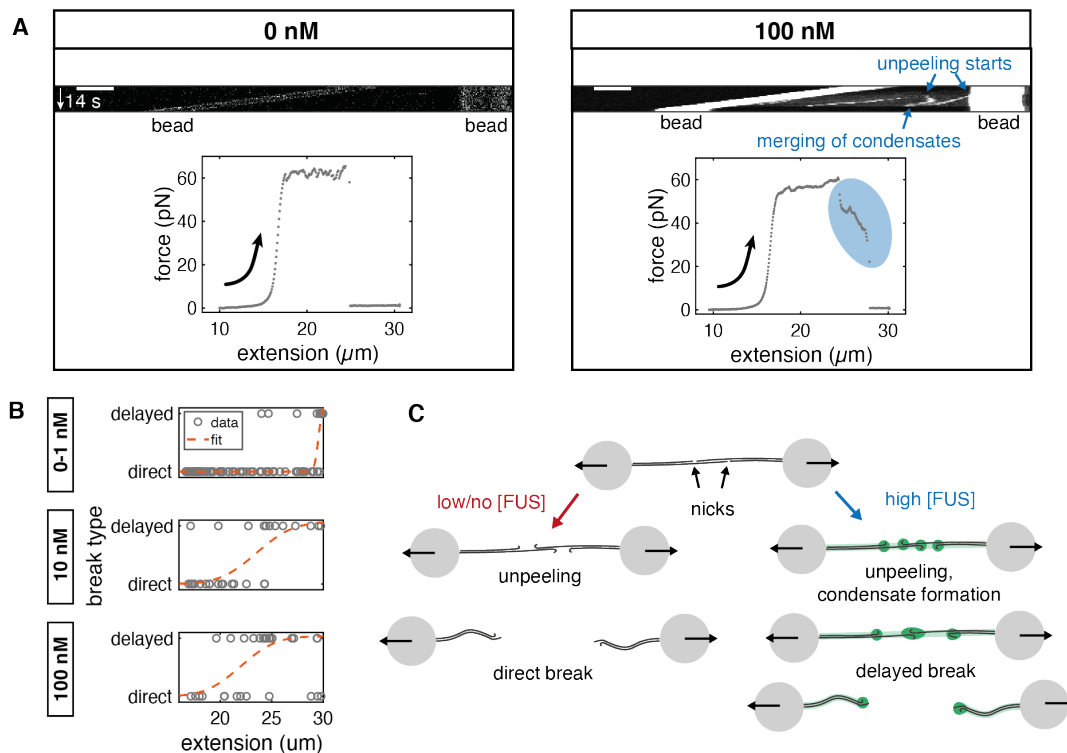

704  
705

### Figure S3. FUS adsorption delays DNA rupturing

706 (A) Kymographs and force-extension curves from DNA rupture experiments at 0 and 100 nM FUS.  
707 Example DNA showed a direct break in absence of FUS, while at 100 nM FUS, the break was delayed.  
708 This delay was accompanied by the fusion of two condensates moving towards each other, visible in  
709 the corresponding kymograph. Scale bar: 4  $\mu\text{m}$

710 (B) Breaks were classified into 'direct' and 'delayed' and the DNA extension at which they occurred  
711 was measured. Error functions were fitted to estimate the characteristic extension above which delayed  
712 breaks typically occurred. Number of analyzed DNA molecules: 0/1 nM: 96, 10 nM: 29, 100 nM: 29

713 (C) Illustration of the rupturing process

714  
715  
716

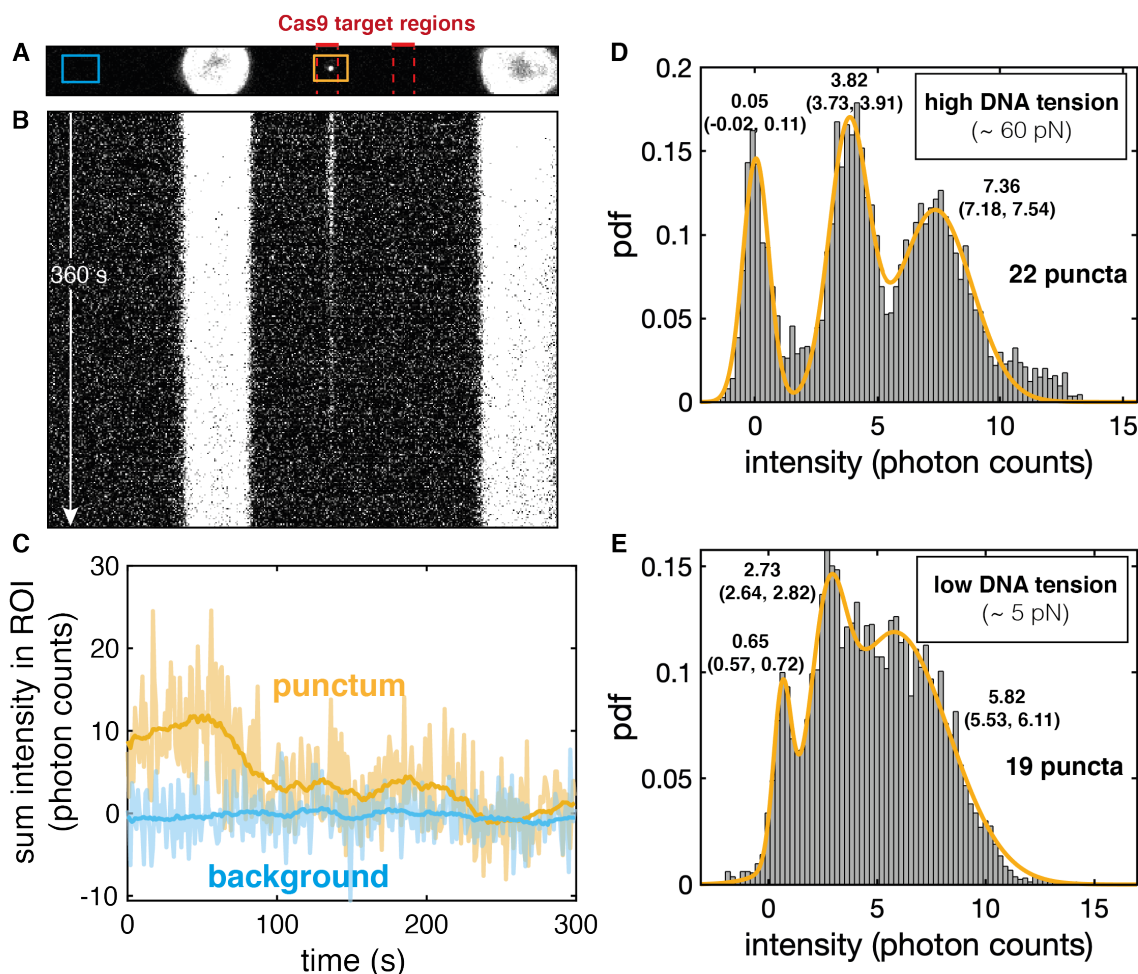

717  
718

**Figure S4. Estimation of single GFP fluorescence intensity using dCas9-GFP**

719 (A) Representative maximum intensity projection image of dCas9-GFP binding to lambda phage DNA.  
720 dCas9-GFP was complexed with 4 different guide RNAs corresponding to 4 adjacent sequences  
721 localized at  $\sim 1/3$  of the contour length of lambda phage DNA. dCas9-RNA complexes were incubated  
722 with lambda phage DNA before binding of DNA to the beads, resulting in the stable attachment of up  
723 to four complexes to the DNA target regions. Imaging was performed with the same settings as the  
724 FUS-DNA binding experiments. DNA was held either in an overstretched configuration (18  $\mu\text{m}$ ,  $\sim 60$   
725 pN) or in a relaxed configuration (15  $\mu\text{m}$ ,  $< 5$  pN).

726 (B) Kymograph of the experiment shown in (A), bead size: 4  $\mu\text{m}$ .

727 (C) Time traces of the summed intensity inside two segments of the imaging ROI (shown in (A)). Light  
728 blue: background ROI. Orange: ROI containing a punctum that represents multiple dCas9-GFP  
729 molecules bound to adjacent sites at  $\sim 1/3$  of the contour length of lambda phage DNA. The time trace  
730 of the punctum shows discrete intensity levels. Over time, intensity decreases, indicative of photo  
731 bleaching events. (Transparent lines: raw intensities, bold lines: moving average over 30 frames).

732 (D) Histogram of intensities (moving average over 30 frames) for imaging experiments performed at  
733 high DNA tension. Three Gaussians were fitted to capture the main peaks. They represent the  
734 background intensity peak as well as the intensity of one and two GFP molecules. (22 puncta were  
735 analyzed).

736 (E) Histogram of intensities (moving average over 30 frames) for imaging experiments performed at  
737 low DNA tension. Three Gaussians were fitted to capture the main peaks. They represent the  
738 background intensity peak as well as the intensity of one and two GFP molecules. Peaks are less distinct  
739 due to the increased fluctuations of DNA at low tension. Moreover, the intensity found for one GFP is  
740 lower (2.73 p.c. compared to 3.82) (19 puncta were analyzed).

741  
742



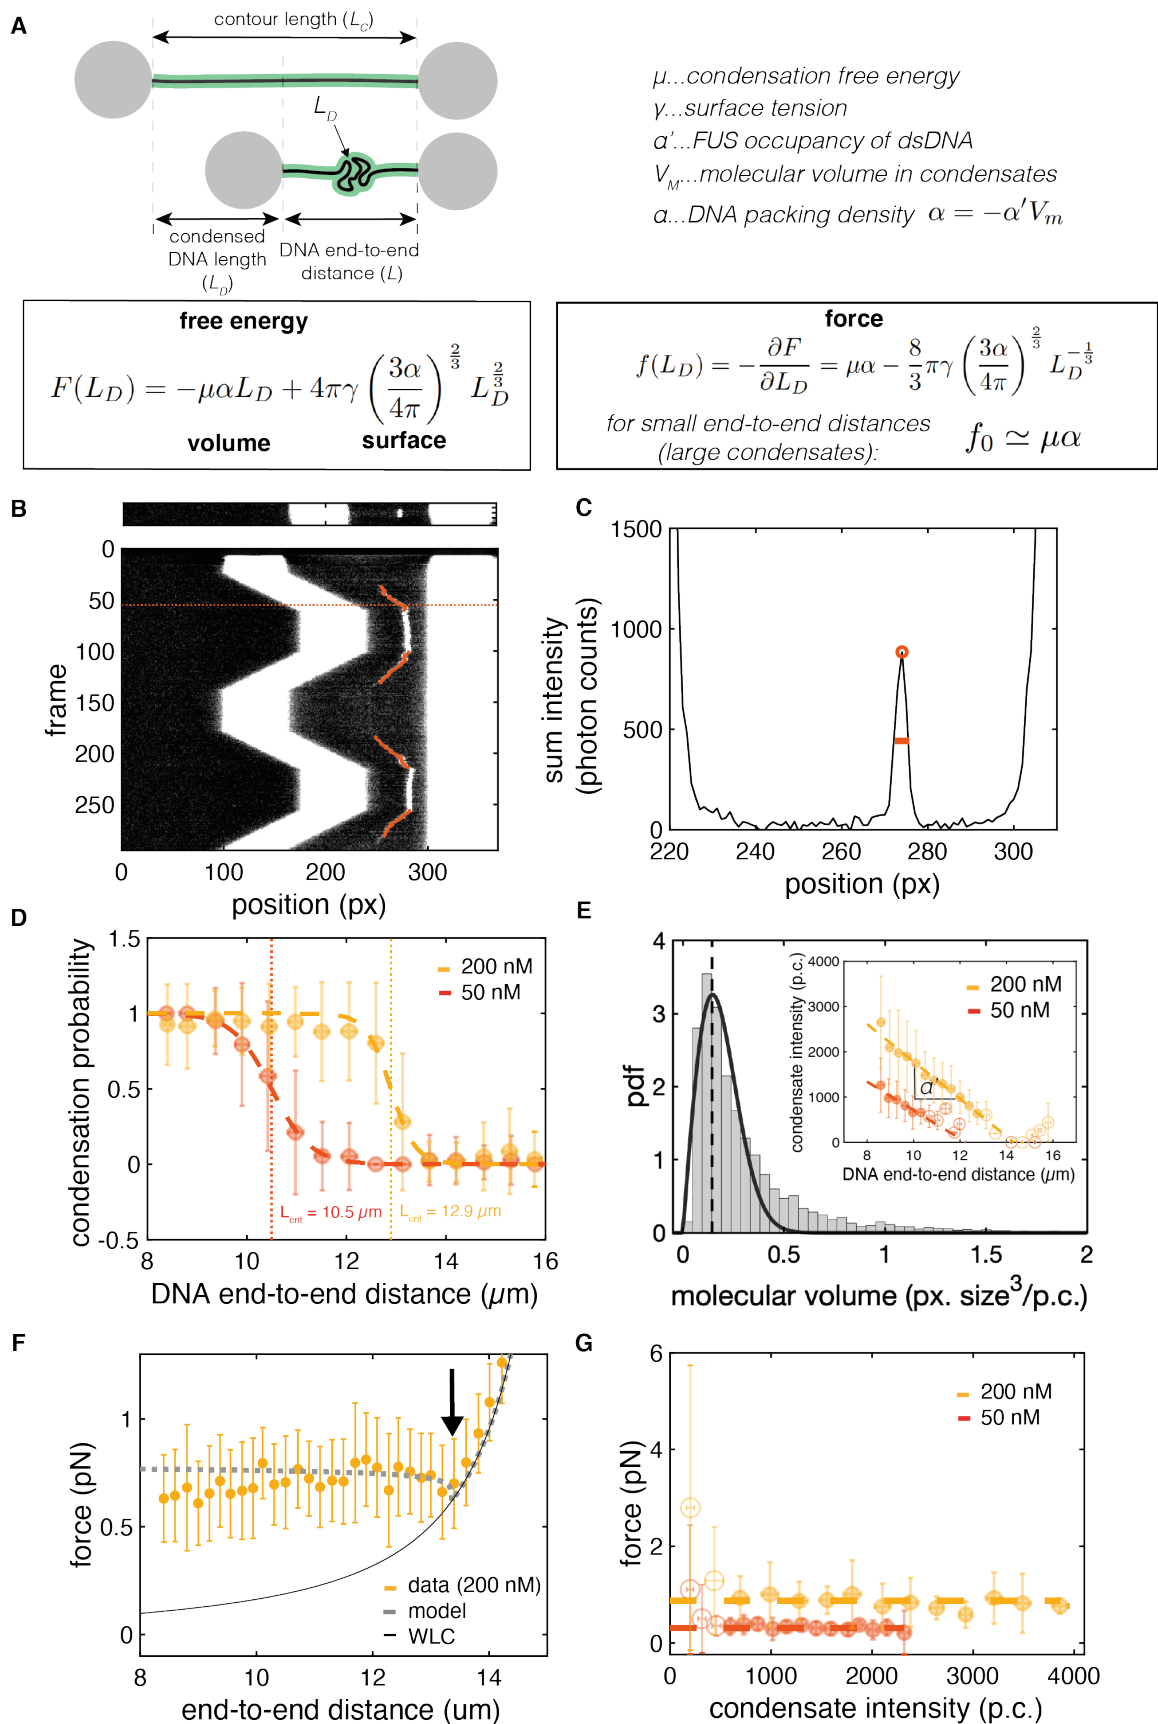

743  
 744

**Figure S5. Analysis of FUS-dsDNA co-condensate formation**

745 (A) Model for DNA condensation mediated by protein attachment. The free energy of the  
746 condensate containing the DNA length  $L_D$  is determined by the volume and the surface tension  
747 of the condensate.  $\alpha$  is the packing factor relating the condensed DNA length to the volume of  
748 the condensate. The force exerted by the condensate in order to pull in more DNA can be  
749 calculated using the negative partial derivative of the free energy with respect to  $L_D$ .

750 (B) Representative snapshot and kymograph of a FUS-dsDNA condensation experiment  
751 performed at 200 nM FUS. Overlaid in red: tracked position of the condensate when the trap  
752 position is changed. Dashed line marks the snapshot shown on top.

753 (C) Sum intensity profile of the snapshot shown in (B). Tracked peak and FWHM are marked.  
754 For downstream analysis, we approximated the total condensate intensity as the product of  
755 peak height and FWHM. FWHM was used as an estimate of the radius of the condensate to  
756 calculate its volume (condensate approximated as sphere).

757 (D) Probability that a condensate forms on a DNA molecule vs. DNA end-to-end distance.  
758 FUS-dsDNA condensates form below a critical, FUS concentration dependent DNA end-to-  
759 end distance  $L_{crit}$ . Data: mean  $\pm$  STD; Red: 50 nM FUS; yellow: 200 nM FUS; dashed lines:  
760 error function fits; dotted lines mark concentration dependent  $L_{crit}$ .

761 (E) Estimation of the packing factor  $\alpha$ .  $\alpha$  is defined as  $\alpha = -\alpha' V_m$ .  $\alpha'$  is the FUS line density  
762 on DNA in FUS-dsDNA condensates.  $V_m$  is the molecular volume of FUS inside condensates.  
763 Large plot: Histogram of the probability density function (pdf) of the ratio of condensate  
764 volume and condensate intensity for all tracked condensates. Fit by a Rayleigh distribution  
765 function allows to extract the average molecular volume (volume per photon count,  $V_M$ ) by  
766 calculating the expectation value of the function. Data: histogram of 51 condensates that  
767 formed on 51 individual DNA molecules, tracked in 4109 frames; black line: Rayleigh function  
768 fitted to histogram. Inset: condensate intensity versus DNA end-to-end distance. Linear  
769 functions were fitted to the regions below  $L_{crit}$ . Concentration dependent  $\alpha'$  is the slope of these  
770 functions. Data: red: condensates formed at 50 nM FUS (29 individual DNA molecules);  
771 yellow: condensates formed at 200 nM FUS (22 individual DNA molecules). Filled circles:  
772 data points classified as 'condensate' (below  $L_{crit}$ ); open circles: data points classified as 'no  
773 condensate' (above  $L_{crit}$ ). Dashed lines: linear fits indicating the linear increase of condensate  
774 size with decreasing DNA end-to-end distance.

775 (F) Force vs. DNA end-to-end distance curve obtained from minimization of the total free  
776 energy (for details see supplementary experimental procedures). A dip at the transition from  
777 WLC to the constant force regime is observed in the experimental data and is captured by a  
778 small, but finite surface tension of the condensate of around 0.15 pN/ $\mu$ m (marked by black  
779 arrow). Yellow: experimental data at 200 nM FUS, mean  $\pm$  STD. Dotted grey line: theory  
780 curve. Black thin line: Worm-like chain model of naked DNA

781 (G) Force vs. condensate intensity plot. Condensates over a broad range of sizes (intensities)  
782 coexist at a constant, FUS concentration dependent force. Yellow and red: same data as shown  
783 above. Dashed lines: linear fit to the horizontal region, indicating the constant force regime.

784

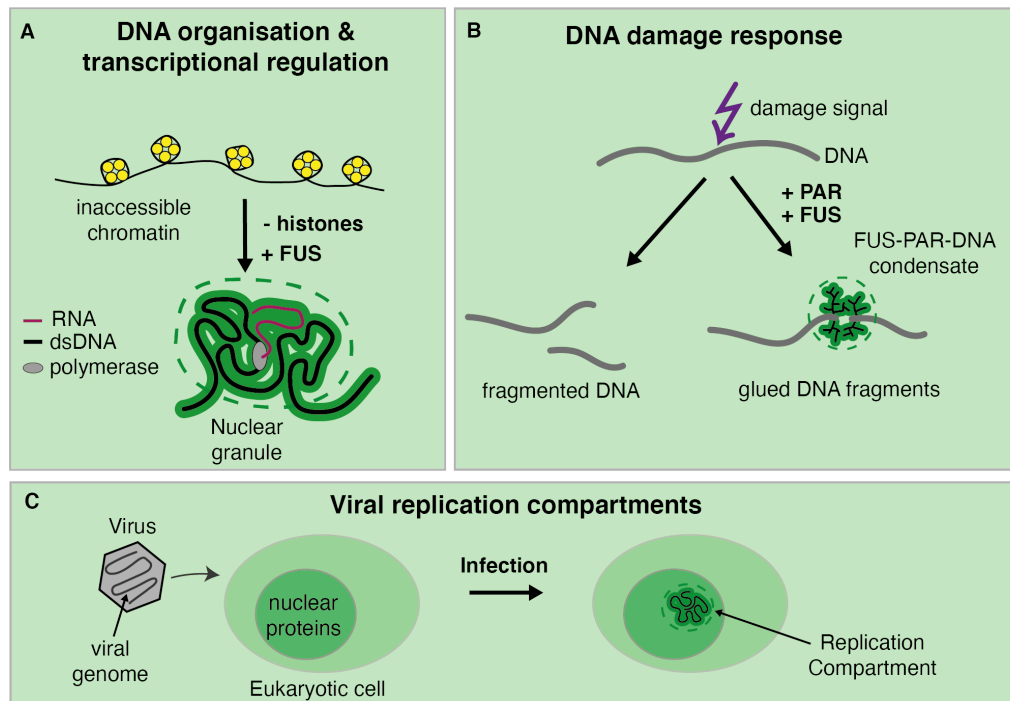

785  
786

**Figure S6. Potential physiological relevance of protein-nucleic acid co-condensation**

787 The mechanism of monolayer protein-nucleic acid co-condensation might be the basis for the formation  
788 of (A) dynamic organizational units of highly accessible dsDNA, for example in the context of  
789 transcriptional regulation; (B) glue-like inducible DNA damage compartments at PARylated DNA  
790 damage sites, or (C) membrane-less Replication Compartments formed by highly accessible viral  
791 genomes with hijacked nuclear proteins of infected cells.

792

## 793 **Experimental procedures**

### 794 **Protein purification**

795 Recombinant full-length FUS-EGFP and FUS- $\Delta$ LCD-EGFP were expressed and purified as  
796 described previously (Patel et al. 2015).

797

### 798 **Optical tweezers experiments**

799 Optical tweezers experiments to study the interaction of FUS-GFP ("FUS") with DNA were  
800 performed using the fully integrated C-Trap G2 (Lumicks, Amsterdam) setup. This instrument  
801 combines optical micromanipulation via up to 4 optical traps with confocal fluorescence  
802 imaging and microfluidics flow chambers. Experimental work flows (microfluidics, trap  
803 steering, imaging settings) were controlled using the Bluelake software (Lumicks,  
804 Amsterdam). The microfluidics setup consisted of the  $\mu$ Flux system and a 4 or 5-channel glass  
805 chip connected via FEP tubing (1/16" x 0.010") (all Lumicks, Amsterdam). All experiments  
806 were carried out using custom Python scripts and at a constant temperature of 28 °C to  
807 maximize reproducibility.

808 Proteins were diluted in FUS buffer (70 mM KCl, 10 mM Tris, pH 7.4) to the final  
809 concentration, typically between 1 and 200 nM. Double-stranded lambda phage DNA that was  
810 biotinylated at the termini of one of the two complementary single strands (Lumicks,  
811 Amsterdam) was diluted to about 20 pg/ $\mu$ L in FUS buffer. 4.4  $\mu$ m Streptavidin coated  
812 polystyrene beads (Spherotech) were diluted to 3‰ (m/v) in FUS buffer. 1 mL of each solution

813 as well as 1 mL of plain FUS buffer were then transferred to the corresponding 4 separate  
814 channels of the  $\mu$ Flux system of the C-Trap. To reach a stable protein concentration in the  
815 protein channel of the flow cell we flushed the liquids at 0.8 bar for at least 45 min. Once stable  
816 experimental conditions were reached, the actual experiments were initiated.

817 To tether single DNA molecules, a mild flow was generated by applying a pressure of 0.2-0.3  
818 bar. Beads were trapped in the corresponding channel and moved into the buffer channel.  
819 There, in order to estimate the stiffness of the optical traps, the thermal calibration was  
820 performed in absence of buffer flow using the in-built thermal calibration routine of the  
821 Bluelake software. The beads were then moved to the DNA channel to fish for DNA tethers.  
822 For that, in presence of mild flow, the bead-to-bead distance was periodically increased and  
823 decreased using the in-built Ping-Pong function of the Bluelake software while the force on the  
824 beads was monitored. When a characteristic force increase in response to increasing bead-to-  
825 bead distance was detected, the beads were moved back to the buffer channel. There, in absence  
826 of flow, we probed whether the tether was a single DNA molecule by measuring its force-  
827 extension curve (FEC) and comparing it with the typical FEC of lambda phage DNA. If the  
828 tether was not a single DNA molecule (or in any other way irregular), the bead pair was  
829 discarded and the routine was started again by catching a new pair of beads. If the tether was  
830 found to be a single DNA molecule, we continued with the actual experiment. DNA molecules  
831 were stretched or relaxed by changing the bead-to-bead distance. ssDNA unpeeling was  
832 induced by increasing the DNA end-to-end distance above the contour length of lambda phage  
833 DNA ( $\sim 16.5 \mu\text{m}$ ).

834

### 835 **Scanning confocal fluorescence imaging**

836 For all fluorescence imaging experiments, the power of the 488 nm excitation laser was set to  
837 5 % (resulting in an output of 2.14  $\mu\text{W}$ ) and the dwell time per pixel (pixel size 100 nm x 100  
838 nm) to 0.05 ms. The size of the Region of Interest (ROI) was, depending on the experiment,  
839 chosen such that it could fit the DNA, the central bead segments and a region on the left side  
840 of the left bead that allowed to estimate the average background fluorescence intensity for each  
841 frame. The frame rate was set with respect to the time scales of interest in the corresponding  
842 experiment on one hand and to minimize photodamage on the other hand and thus varied  
843 between 2 and 0.25 frames per second (fps).

844

### 845 **Buffer exchange experiments**

846 Individual lambda phage DNA molecules were stretched to 20  $\mu\text{m}$  extension inside the buffer  
847 channel, leading to unpeeling of ssDNA starting from free ends at nicks and the DNA termini.  
848 This resulted in DNA molecules that consisted of segments of stretched dsDNA and ssDNA  
849 (at 65 pN) and relaxed ssDNA protruding from the tether at the interfaces of the stretched  
850 segments. For the binding process, the overstretched DNA molecules were then transferred  
851 into the protein channel while fluorescence imaging at the for this ROI size highest possible  
852 frame rate of 2 fps was performed for 60 s. To study the unbinding of FUS from DNA, the  
853 individual DNA molecules were transferred back to the buffer channel while imaging at 1  
854 frame every 4 seconds (0.25 fps) was performed for 480 s in total. The reduced imaging  
855 frequency was chosen in order to minimize photo damage during these long experiments.  
856 Typically, an additional binding experiment (re-binding, same settings as initial binding) was  
857 then performed to study the reversibility of FUS-DNA interaction.

858

### 859 **Step-wise overstretching experiments**

860 Individual DNA molecules were transferred into the protein channel and the bead-to-bead  
861 distance (and hence the extension of the DNA) was increased in steps of 1  $\mu\text{m}$  at 5  $\mu\text{m/s}$  every  
862 10 s from initially 16  $\mu\text{m}$  until the molecule broke. Imaging was performed at 1 fps.

### 863 864 **dsDNA flow-stretch experiments**

865 Individual beads were held in a single trap and briefly (5-10 s) incubated in the DNA channel  
866 in presence of mild flow (0.1 bar applied) to catch individual DNA molecules attached via only  
867 one end. The beads were subsequently moved to the protein channel while the flow was  
868 maintained. During this process, imaging was performed at rates of about 1 fps.

### 869 870 **Repetitive dsDNA relaxation experiments**

871 Individual DNA molecules were transferred to the protein channel. Starting from an initial  
872 extension of 16  $\mu\text{m}$ , they were relaxed to 8  $\mu\text{m}$  at 0.5  $\mu\text{m/s}$ . After a waiting period of 20 s, the  
873 molecules were stretched to 16  $\mu\text{m}$ . This was followed by another 20 s waiting period,  
874 relaxation to 8  $\mu\text{m}$  and another 20 s waiting period. Finally, the bead-to-bead distance was first  
875 increased to 31  $\mu\text{m}$  to rupture the molecule and then again decreased to 8  $\mu\text{m}$  to estimate the  
876 force base line. During the whole experiment, fluorescence imaging was performed at 2 fps  
877 and force and bead-to-bead distance were recorded.

### 878 879 **dsDNA zippering experiments**

880 Three Streptavidin coated polystyrene beads were trapped in three optical traps in a triangular  
881 configuration and moved to the DNA channel (beads 1, 2 and 3). In presence of mild buffer  
882 flow, the two beads that were aligned in parallel to the flow direction were used to fish for a  
883 DNA tether using the Ping-Pong function of the Bluelake software (beads 1 and 2). When the  
884 formation of a tether was detected using the force signal, the three beads were moved to the  
885 buffer channel again. The beads then were moved to the protein channel. Simultaneously,  
886 fluorescence imaging with a rate of approx. one frame every 5 seconds was started. The low  
887 imaging frequency was due to the large ROI required for this experiment. Once the beads were  
888 transferred to the protein channel, DNA got coated with FUS. Occasionally, an additional  
889 single DNA tether between bead 3 and 2 was formed during the process of transferring the  
890 beads from the DNA channel to the protein channel. In these cases, we straightened the tether  
891 between bead 1 and 2 by setting a bead-bead distance of around 16  $\mu\text{m}$ . Further, we approached  
892 bead 3 towards the tether between bead 3 and 2 in order to enable contacting of the two FUS  
893 coated DNA tethers. We periodically approached and retracted bead 3 from the tether between  
894 beads 1 and 2 to see if potentially occurring FUS mediated zippering effects of the two DNA  
895 tethers were reversible.

### 896 897 **General data handling**

898 Data analysis was performed using custom Matlab (Mathworks) routines. Image representation  
899 was performed using FIJI v. 1.51h.

900 For quantification of FUS intensities on DNA, background-subtracted images were generated.  
901 For that, the average background intensity of FUS in solution (obtained from regions of the  
902 image far away from beads and DNA) was computed for every frame of a time series and then  
903 subtracted from the intensity of every individual pixel of the corresponding frame.

904 Intensity profiles along the DNA direction were calculated by summing up background  
905 subtracted pixel intensities orthogonally to the DNA direction. Kymographs were generated by  
906 plotting the intensity profile of each frame versus the frame number.

907

## 908 **Analysis of buffer exchange experiments**

909 Buffer exchange experiments were performed (1) to study the kinetics and equilibrium  
910 properties of FUS-DNA interaction and (2) to study shape changes of FUS-ssDNA condensates  
911 over time.

912 To study kinetics and equilibrium properties of FUS-DNA interaction, kymographs were  
913 manually segmented into regions of stretched dsDNA, stretched ssDNA and puncta (FUS-  
914 ssDNA condensates). Segmentation was done according to plausibility of the intensity pattern  
915 in terms of the DNA overstretching model and the expected relative intensity values. Intensity-  
916 time traces of each DNA segment were calculated by averaging of the intensities of all pixels  
917 in a segment for each frame. Average intensity-time traces of the different types of DNA  
918 (stretched ssDNA, stretched dsDNA, puncta) for binding and unbinding experiments  
919 performed at different FUS concentrations were calculated by averaging the intensity-time  
920 traces of every segment obtained for the corresponding experiment type (binding or unbinding)  
921 at the corresponding FUS concentration.

922 To extract unbinding rates, the average intensity-time traces obtained from unbinding  
923 experiments were fitted using single or double exponential functions. Fitting was performed  
924 from the time point at which the background intensity dropped (indicating that the DNA had  
925 left the protein channel) to the last time point of the experiment (480 s). The quality of fitting  
926 (represented by the  $R^2$  value) drastically improved by using double exponentials instead of  
927 single exponentials, particularly at elevated FUS concentrations.

928 Equilibrium intensities of FUS on stretched ssDNA and stretched dsDNA (i.e. the line density  
929 of FUS on DNA) were calculated by averaging the intensity-time traces obtained from binding  
930 experiments performed at different FUS concentrations over the last 30 s (i.e. when the  
931 equilibrium was reached).

932 To study shape changes of FUS-ssDNA condensates over time, segments of ‘puncta’ were  
933 obtained from kymographs of FUS binding experiments as described above. A custom peak  
934 finding algorithm was used to obtain the maximum intensity and the width of puncta in each  
935 frame of an experiment. The total intensity of a punctum was calculated as the product of  
936 maximum intensity and peak width.

937 For ensemble analysis, the individual time traces of maximum intensity, total intensity and  
938 punctum width were normalized to their final value (last 10 s of the experiment). Puncta were  
939 classified according to whether they rounded up in the course of the binding experiment. A  
940 punctum was classified as “rounded” if the normalized final maximum intensity (last 10 s of  
941 the experiment) was at least higher than the normalized initial maximum intensity (first 10 s  
942 after punctum formation) plus four times the corresponding standard deviation. Mean time  
943 traces of maximum intensity, total intensity and punctum width were calculated according to  
944 this classification.

945

946

## 947 **Analysis of FUS mediated ssDNA adhesion**

948 Increasing the DNA end-to-end distance leads to progressive conversion of dsDNA to ssDNA  
949 via unpeeling from free ssDNA ends. Nicks in the ssDNA backbones of the dsDNA molecules  
950 define boundaries of potential ssDNA fragments. During overstretching, progressive unpeeling  
951 from the fragment boundaries will lead to dissociation of ssDNA fragments.

952 For analysis, we evaluated events in which two unpeeling fronts propagated towards each other  
953 when the DNA end-to-end distance was increased. When two of these fronts met and fused,  
954 they subsequently either disappeared from the field of view, indicating that the corresponding  
955 ssDNA fragment detached from the rest of the DNA molecule, or stayed attached to the rest of  
956 the tethered DNA molecule. According to this behavior, we classified events into ‘attached’ or

957 ‘detached’. We only considered an event if the DNA tether remained intact (did not break) for  
958 at least one more step of the step-wise increase of DNA end-to-end distance.

959

### 960 **Analysis of FUS-ssDNA co-condensate composition**

961 When a dsDNA molecule does not have nicks in its backbones, ssDNA unpeeling during  
962 overstretching will exclusively occur from the DNA termini, leading to the formation of exactly  
963 two FUS-ssDNA condensates on the DNA tether in presence of FUS. In this case, the number  
964 of nucleotides unpeeled from each of the two ends of the molecule and hence incorporated into  
965 each of the two condensates can be calculated from the distance between a condensate and the  
966 corresponding bead. This distance divided by the length of a ssDNA nucleotide at 65 pN (0.58  
967 nm per nucleotide) yields the number of nucleotides in the corresponding condensate.

968 For every step of a step-wise overstretching experiment, in which a suitable unpeeling event  
969 occurred, we calculated the intensity profile along the DNA molecule and selected the positions  
970 of the beads and the boundaries of the condensates. From this information we calculated the  
971 integrated intensity of a condensate and the corresponding number of incorporated nucleotides.  
972 We plotted this intensity over the corresponding number of nucleotides for experiments  
973 performed in the concentration range between 1 and 200 nM FUS.

974 For each FUS concentration we fitted the relation between condensate intensity and number of  
975 nucleotides with a linear function. The slope of this function determines the FUS-GFP intensity  
976 per nucleotide in a condensate at a given FUS concentration and hence serves as a proxy for  
977 the ratio between protein and nucleotides in a condensate.

978 We plotted the slopes with respect to the corresponding FUS concentration and subsequently  
979 fitted a Langmuir isotherm in the form of  $q = \frac{q_m \cdot [FUS]}{K_m + [FUS]}$  to the data ( $q_m$  being the saturation  
980 occupancy of nucleotides with FUS,  $K_m$  being the FUS concentration at which the occupancy  
981 has reached half of its maximum value,  $[FUS]$  being the FUS concentration).

982

### 983 **Analysis of FUS-dsDNA co-condensates**

984 When dsDNA was relaxed in presence of sufficiently high concentrations of FUS (> 30 nM),  
985 FUS-dsDNA condensates formed. While in few instances multiple condensates formed, for  
986 analysis we focused on events where only a single condensate formed per single dsDNA  
987 molecule. We recorded image stacks for two consecutive relax-stretch cycles at 2 fps.

988 The free energy  $F$  of a FUS-dsDNA condensate containing the DNA length  $L_D$  can be described  
989 using a volume contribution and a surface contribution (Figure S5A), building on a framework  
990 introduced in (Quail et al. 2020):

$$991 \quad F(L_D) = -\mu\alpha L_D + 4\pi\gamma \left(\frac{3\alpha}{4\pi}\right)^{2/3} L_D^{2/3}.$$

992  $\mu$  is the condensation free energy per volume,  $\alpha$  is the packing factor relating  $L_D$  to the  
993 condensate volume,  $\gamma$  is the surface tension. The force required to extract a piece of DNA from  
994 the condensate is

$$995 \quad f(L_D) = \mu\alpha - \frac{8}{3}\pi\gamma \left(\frac{3\alpha}{4\pi}\right)^{2/3} L_D^{-1/3}.$$

996

997 For small surface tension and high values of  $L_D$  (corresponding to low DNA end-to-end  
998 distances), this expression approaches a constant DNA tension  $f_0 \approx \mu\alpha$ .

999 To analyze the mechanical properties and to finally estimate the condensation free energy per  
1000 FUS molecule in FUS-dsDNA condensates, for each frame of a stack, we extracted the  
1001 position, width (FWHM) and maximum intensity of the condensate using a custom peak

1002 finding algorithm (Figure S5B). The total intensity of a detected condensate in each frame was  
1003 calculated as the product of maximum intensity and peak width (Figure S5C).

1004 To correct for the base-line of the force signal, each experiment was concluded by rupturing of  
1005 the DNA molecule (increase of bead-to-bead distance to 31  $\mu\text{m}$ ) and subsequent approach of  
1006 the untethered beads to 7  $\mu\text{m}$  bead-bead distance. The corresponding force signal served as a  
1007 base line that was subtracted from the force signal recorded in presence of the DNA tether.

1008 The base-line subtracted force-distance signal was synchronized with the fluorescence imaging  
1009 data. For that, the raw force-distance signal ( $\sim 9$  Hz) was down sampled to 2 Hz.

1010 The intensity of tracked condensates for every frame in which a condensate was detected was  
1011 correlated to the force at which it existed and to the corresponding DNA end-to-end distance.

1012 Downstream analysis was restricted to the part of the process where the initially stretched  
1013 dsDNA molecule was relaxed from 16 to 8  $\mu\text{m}$  end-to-end distance (unless indicated  
1014 differently). Subsequent stretching and relaxation processes in presence of FUS appeared to  
1015 alter the mechanical properties of the DNA.

1016 We first investigated at which DNA end-to-end distances FUS-dsDNA condensates exist  
1017 (Figure S5D). For that we analyzed the probability to find a condensate at the different DNA  
1018 end-to-end distances between 16 and 8  $\mu\text{m}$  during the initial relaxation process. The step-like  
1019 shapes of the curves were fitted with error functions in the shape of

$$1020 \quad p(L) = \frac{1}{1 + e^{-\frac{L - L_{\text{crit}}}{\alpha}}}$$

1021  $p$  is the probability to find a condensate,  $L$  is the DNA end-to-end distance,  $L_{\text{crit}}$  is the critical  
1022 DNA end-to-end distance below which condensates typically form.

1023 Packing factor  $\alpha$  was obtained as the product of the negative slope of the linear relation between  
1024 condensate intensity and DNA end-to-end distance  $\alpha'$  and the molecular volume  $V_M$  of FUS in  
1025 condensates (Figure S5E).  $V_M$  was obtained from the expectation value of a Rayleigh  
1026 distribution fit to the histogram of the ratio between volume and intensity of each detected  
1027 condensate in each frame it was detected. For calculating the condensate volume, condensates  
1028 were assumed to be spherical with a diameter equal to the FWHM obtained from tracking.

1029  $\alpha'$  was obtained from a linear fit to the condensate intensity vs. DNA end-to-end distance at  
1030 DNA end-to-end distances below  $L_{\text{crit}}$ .

1031 The number of FUS molecules bound per DNA length inside condensates was estimated using  
1032  $\alpha'$  and the intensity of a single GFP. This yielded  $\sim 115$  FUS molecules bound per  $\mu\text{m}$  of  
1033 condensed DNA at 50 nM FUS (corresponding to a spacing of one FUS molecule every  $\sim 26$   
1034 bp) and  $\sim 150$  FUS molecules bound per  $\mu\text{m}$  of condensed DNA at 200 nM FUS (corresponding  
1035 to a spacing of one FUS molecule every  $\sim 20$  bp).

1036 The critical force  $f_0$  was finally obtained as the mean force exerted by the condensates below  
1037  $L_{\text{crit}}$  (Figure 6H).  $\mu$  as energy per volume was obtained by dividing the critical force by the  
1038 corresponding packing factor for 50 and 200 nM FUS. To estimate  $\mu$  of a single FUS  
1039 molecules, we approximated the number of FUS molecules per  $\mu\text{m}^3$  using the molecular  
1040 volume (in units of  $\mu\text{m}^3$  per photon count) and the intensity of a single GFP molecule (in units  
1041 of photon counts per molecule) extracted from Figure S4. To convert into units of  $k_B T$  per FUS  
1042 molecule we assumed a temperature of 303 K and hence a conversion relation of  $1 k_B T = 4.2e$   
1043  $-3$  pN $\mu\text{m}$ .

#### 1044 **Estimation of number of FUS molecules per condensate**

1046 To estimate the number of FUS-EGFP molecules in a condensate (Figure S4) we calibrated the  
1047 fluorescence intensity using tightly bound Cas9-EGFP molecules in DNA as introduced in  
1048 Morin *et al.* 2020. In brief, Cas9-EGFP was incubated with 4 different types of guide RNA  
1049 molecules that had sequences complementary to 4 adjacent sequences at about 1/3 of the length



1050 of lambda phage DNA. The formed complexes were incubated with lambda phage DNA  
1051 molecules so that up to 4 Cas9-EGFP molecules could tightly attach to the DNA molecules.  
1052 Individual pre-incubated lambda DNA molecules were imaged at the conditions used for FUS-  
1053 DNA experiments for 360 s (pixel size 100 nm, pixel dwell-time 0.05 ms, frame rate 1 fps).  
1054 DNA molecules were held either at ~60 pN or at below 5 pN to allow for fluorescence  
1055 calibration that could either be used for FUS-ssDNA condensates (formed on top of  
1056 overstretched DNA tethers) or for FUS-dsDNA condensates (present at forces below 5 pN).  
1057 The time traces of background subtracted sum intensities of puncta found in the DNA target  
1058 regions were extracted (moving average over 30 frames). Multiple Gaussian distributions were  
1059 fit to the probability density function (pdf) of intensities. The position of the first peak (after  
1060 the ‘background peak’) was used as an estimate of the intensity of a single EGFP at either low  
1061 or high DNA tension.

1062

## 1063 **Supplementary experimental procedures**

### 1064 **Analysis of the influence of FUS on DNA rupturing behavior**

1065 To study whether FUS influences the rupturing behavior of DNA, individual DNA molecules  
1066 were transferred into the protein channel. Their extension was continuously increased at 1  $\mu\text{m/s}$   
1067 until they broke, starting from 10  $\mu\text{m}$  (Figure S3). Imaging was performed at 1 fps. Breaks  
1068 observed in the force-extension curves were classified according to the extension at which they  
1069 occurred and whether they occurred directly (force drop from overstretching plateau to zero  
1070 within few data points) or in a delayed manner (via multiple intermediate states). The type of  
1071 breaking event vs. the extension at which it occurred was the plotted for the FUS concentration  
1072 range between 0 and 100 nM. A characteristic extension for the switch from direct to delayed  
1073 breaks was estimated using an error function fit. At 100 nM a group of data points indicating  
1074 direct breaks at around 30  $\mu\text{m}$  extension was excluded from the fit as they probably were  
1075 associated with rupturing of the DNA at the junctions with the beads rather than being caused  
1076 by DNA unpeeling.

1077

### 1078 **dCas9-EGFP preparation, imaging and intensity analysis**

1079 Recombinantly expressed dCas9-EGFP was stored at 5.3 mg/ml at  $-80^\circ\text{C}$  in storage buffer (250  
1080 mM HEPES pH 7.3, 250 mM KCl) and thawed 1 h prior to the experiment. sgRNAs were made  
1081 using an in vitro expression kit against the following four adjacent target loci on lambda DNA  
1082 + NGG PAM sequence GGGAGTATCGGCAGCGCCAT TGG,  
1083 GGAGGATTTACGGGAACCGG CGG, GGCAACCAGCCGGATTGGCG TGG,  
1084 GGCGGTTATGTCGGTACACC GGG. The spacing between adjacent target sequences was  
1085 adjusted to 40 to 50 bp to prevent steric hindering of adjacent dCas9-sgRNA complexes. The  
1086 target region marked by the 4 adjacent RNA sequences corresponds to a region at 1/3 (or 2/3)  
1087 of the DNA contour. Guide RNAs were expressed and purified using commercial kits  
1088 (MEGAscript T7 Transcription Kit, Invitrogen and mirVana miRNA isolation Kit, Invitrogen);  
1089 stored in ddH<sub>2</sub>O at 0.6 – 1 mg/mL at  $-80^\circ\text{C}$  and thawed together with the dCas9-EGFP protein  
1090 1 h prior to the experiment.

1091 First, 2  $\mu\text{L}$  of dCas9-EGFP were pre-diluted into 38  $\mu\text{L}$  complex buffer (20mM Tris-HCl pH  
1092 7.5, 200 mM KCl, 5 mM MgCl<sub>2</sub>, 1 mM DTT) prior to the complexing reaction. Second, 5  $\mu\text{L}$   
1093 of the 20x dCas9-EGFP dilution were mixed with 4  $\mu\text{L}$  sgRNA stock which contained all four  
1094 sgRNAs in equal stoichiometries. Subsequently, the reaction volume was adjusted to 50  $\mu\text{L}$  by  
1095 adding 41  $\mu\text{L}$  complex buffer and incubated at room temperature ( $22^\circ\text{C}$ ) for 30 min.

1096 After incubation was completed, the 10  $\mu\text{L}$  of the dCas9-sgRNA complex reaction are mixed  
1097 with 1  $\mu\text{L}$  of 5 nM biotinylated lambda DNA. The reaction volume was then adjusted to 50  $\mu\text{L}$

1098 by adding 39  $\mu\text{L}$  reaction buffer (40 mM Tris-HCl pH 7.5, 200 mM KCl, 1 mg/mL BSA, 1 mM  
1099  $\text{MgCl}_2$  and 1 mM DTT) followed by a second incubation for 30 min at room temperature  
1100 ( $22^\circ\text{C}$ ).

1101 Lambda phage DNA molecules were diluted in FUS buffer and transferred to the microfluidics  
1102 system of the C-Trap setup. Individual DNA molecules equipped with dCas9-guide RNA  
1103 complexes were tethered as described before. Fluorescence imaging was performed at 1 fps  
1104 over 360 frames with a pixel size of 100 nm, a pixel dwell time of 0.05 ms and 5% intensity of  
1105 the 488 nm excitation laser. DNA molecules were held at a tension of either  $\sim 5$  pN ('low  
1106 tension') or  $\sim 60$  pN ('high tension').

1107 For image analysis, every frame was background subtracted. Fluorescent puncta sitting at 1/3  
1108 or 2/3 of the DNA contour length were segmented and the total intensity within these ROIs  
1109 was extracted for each frame of each experiment (Figure S4). Note that puncta that were  
1110 observed outside of the DNA target regions at 1/3 or 2/3 of the DNA contour length were not  
1111 considered for analysis as they were suspected to represent dysfunctional and hence potentially  
1112 aggregated dCas9-EGFP.

1113 For DNA held at low or high tension, the probability density function (pdf) of the intensity  
1114 inside the ROI in each frame was represented in a histogram. Notably, only up to 3 or 4 clear  
1115 peaks were visible, indicating that typically not all 4 different dCas-RNA complexes were  
1116 bound to the target region of the DNA. The peaks were fitted using Gaussian functions and the  
1117 position of the second peak (the first one depicts the background intensity) was considered to  
1118 be the approximate intensity of a single EGFP molecule under the corresponding imaging  
1119 conditions (at high DNA tension:  $3.82 \pm 0.09$  p.c.; at low DNA tension:  $2.72 \pm 0.09$  p.c. (95%  
1120 confidence interval)).

1121

## 1122 **Towards a full model of the FUS-dsDNA co-condensates held in optical traps**

1123 To capture the full force vs. end-to-end distance curve of the FUS-dsDNA condensate in a dual  
1124 trap optical tweezer experiment, we consider a free energy that contains contributions from the  
1125 FUS-DNA condensate, the stretched DNA polymer, and the optical traps.

1126 The free energy  $F_{cond}$  of the condensate is written as

$$1127 \quad F_{cond} = -\mu\alpha L_D + 4\pi\gamma \left(\frac{3\alpha}{4\pi}\right)^{2/3} L_D^{2/3},$$

1128 where  $\mu$  denotes the condensation free energy per volume,  $L_D$  is the length of DNA contained  
1129 in the condensate,  $\alpha$  is the packing factor relating  $L_D$  to the condensate volume, and  $\gamma$  is the  
1130 surface tension (Quail *et al.*, 2020). The mechanical energy  $F_{WLC}$  stored in a stretched DNA  
1131 polymer is determined by integration of the polymer force  $f_{WLC}$  (Worm Like Chain, WLC)  
1132 (Smith, Cui and Bustamante, 1996) according to

$$1133 \quad F_{WLC} = \int_0^{x_D} f_{WLC}(x) dx,$$

1134 with

$$1135 \quad f_{WLC} = \frac{k_B T}{P} \left( \frac{1}{4} \left( 1 - \frac{x_D}{L} \right) - \frac{1}{4} + \frac{x_D}{L} \right)^{-2}.$$

1136

1137 Here,  $T$  denotes the absolute temperature,  $k_B$  is Boltzmann's constant,  $L$  is the contour length  
1138 of the DNA that is not condensed ( $L = L_C - L_D$  with  $L_C$  denoting the contour length of  $16.5 \mu\text{m}$   
1139 of the entire piece of lambda phage DNA), and  $x_D$  is the DNA end-to-end distance and thus the  
1140 separation distance between the surfaces of the two beads in the optical trap. The energy stored  
1141 in the two optical traps is given by

1142 
$$F_{traps} = \frac{K}{4}(S - x_D)^2,$$

1143  
1144 where  $K$  denotes the stiffness of the optical traps and  $S$  is the distance between the two trap  
1145 centers, minus twice the radius of the beads. Hence,  $S - x_D$  denotes the summed displacement  
1146 of the two beads in the two optical traps. The total free energy of the system  $F$  is now given by  
1147

1148 
$$F = F_{cond} + F_{WLC} + F_{traps}.$$

1149  
1150 We consider the ensemble where the distance  $S$  between the two trap centers is fixed, and  $x_D$   
1151 and  $L_D$  are fluctuating quantities that approach values that correspond to a minimum of  $F$ . We  
1152 determine this minimum numerically for the following values of the input parameters:  
1153  $L_C = 16.5 \mu\text{m}$ ,  $k_B T = 4.15 \text{ pNnm}$ ,  $P = 50 \text{ nm}$ ,  $\mu = 11.78 \text{ pN}/\mu\text{m}^2$ ,  $\alpha = 0.059 \mu\text{m}^2$ ,  $\gamma =$   
1154  $0.15 \text{ pN}/\mu\text{m}$ ,  $K = 0.15 \text{ pN/nm}$ . For a pair of values of  $L_D$  and  $x_D$  at which  $F$  is minimal, we  
1155 determine the DNA tension according to  $-\frac{\partial F_{traps}}{\partial x_D}$  or partial  $\frac{\partial F_{WLC}}{\partial x_D}$ . The resulting force vs. end-  
1156 to-end distance curve was plotted on top of the experimental data obtained for 200 nM FUS  
1157 (Figure S5F).  
1158  
1159  
1160

## 1161 **Supplementary movies**

1162 **Movie S1**  
1163 Continuous overstretching of lambda phage DNA in presence of 100 nM FUS showing  
1164 homogeneous adhesion of FUS to stretched ssDNA and dsDNA and formation of condensates  
1165 of FUS with unpeeled ssDNA (bead size: 4  $\mu\text{m}$ )  
1166

1167 **Movie S2**  
1168 Repetitive overstretching of lambda phage DNA in presence of 100 nM FUS, showing  
1169 reversibility of FUS-ssDNA condensate formation (bead size: 4  $\mu\text{m}$ )  
1170

1171 **Movie S3**  
1172 Step-wise overstretching of lambda phage DNA in presence of 100 nM FUS, indicating  
1173 viscoelastic-like material properties of FUS-ssDNA condensates (bead size: 4  $\mu\text{m}$ )  
1174

1175 **Movie S4**  
1176 A single lambda phage DNA molecule attached to a bead and stretched by hydrodynamic flow.  
1177 Attachment of FUS (100 nM) leads to DNA condensation (bead size: 4  $\mu\text{m}$ )  
1178

1179 **Movie S5**  
1180 Repetitive stretch-relax cycles of lambda phage DNA in presence of 100 nM FUS at end-to-  
1181 end distances below the DNA contour length. Reversible formation of a FUS-dsDNA  
1182 condensate is observed (bead size: 4  $\mu\text{m}$ )  
1183

1184 **Movie S6**  
1185 FUS-mediated reversible zippering of two dsDNA strands studied using three optical traps  
1186 (bead size: 4  $\mu\text{m}$ )  
1187

## 1188 **References**

- 1189  
1190 Aguzzi, A. and Altmeyer, M. (2016) “Phase Separation: Linking Cellular  
1191 Compartmentalization to Disease,” *Trends in Cell Biology*. doi: 10.1016/j.tcb.2016.03.004.  
1192 Alberti, S. and Dormann, D. (2019) “Liquid–Liquid Phase Separation in Disease,” *Annual*  
1193 *Review of Genetics*, 53(1), pp. 171–194. doi: 10.1146/annurev-genet-112618-043527.  
1194 Aleksandrov, R. *et al.* (2018) “Protein Dynamics in Complex DNA Lesions,” *Molecular Cell*,  
1195 69(6), pp. 1046–1061.e5. doi: 10.1016/j.molcel.2018.02.016.  
1196 Altmeyer, M. *et al.* (2015) “Liquid demixing of intrinsically disordered proteins is seeded by  
1197 poly(ADP-ribose),” *Nature Communications*, 6. doi: 10.1038/ncomms9088.  
1198 Atkins, P., de Paula, J. and Keeler, J. (2017) *Atkins’ Physical Chemistry*. 11th edn. London,  
1199 England: Oxford University Press.  
1200 Banani, S. F. *et al.* (2017) “Biomolecular condensates: organizers of cellular biochemistry,”  
1201 *Nature Publishing Group*. doi: 10.1038/nrm.2017.7.  
1202 Brangwynne, C. P. *et al.* (2009) “Germline P granules are liquid droplets that localize by  
1203 controlled dissolution/condensation.,” *Science (New York, N.Y.)*, 324(5935), pp. 1729–32. doi:  
1204 10.1126/science.1172046.  
1205 Brangwynne, C. P., Mitchison, T. J. and Hyman, A. A. (2011) “Active liquid-like behavior of  
1206 nucleoli determines their size and shape in *Xenopus laevis* oocytes,” *Proceedings of the*  
1207 *National Academy of Sciences of the United States of America*, 108(11), pp. 4334–4339. doi:  
1208 10.1073/pnas.1017150108.  
1209 Brouwer, I. *et al.* (2016) “Sliding sleeves of XRCC4-XLF bridge DNA and connect fragments  
1210 of broken DNA,” *Nature*, 535(7613), pp. 566–569. doi: 10.1038/nature18643.  
1211 Candelli, A. *et al.* (2014) “Visualization and quantification of nascent RAD51 filament  
1212 formation at single-monomer resolution,” *Proceedings of the National Academy of Sciences of*  
1213 *the United States of America*, 111(42), pp. 15090–15095. doi: 10.1073/pnas.1307824111.  
1214 Cho, W. K. *et al.* (2018) “Mediator and RNA polymerase II clusters associate in transcription-  
1215 dependent condensates,” *Science*, 361(6400), pp. 412–415. doi: 10.1126/science.aar4199.  
1216 Cristofalo, M. *et al.* (2020) “Cooperative effects on the compaction of DNA fragments by the  
1217 nucleoid protein H-NS and the crowding agent PEG probed by Magnetic Tweezers.” doi:  
1218 10.1016/j.bbagen.2020.129725.  
1219 Feric, M. *et al.* (2016) “Coexisting Liquid Phases Underlie Nucleolar Subcompartments,” *Cell*,  
1220 165(7), pp. 1686–1697. doi: 10.1016/j.cell.2016.04.047.  
1221 Fujii, R. and Takumi, T. (2005) “TLS facilitates transport of mRNA encoding an actin-  
1222 stabilizing protein to dendritic spines,” *Journal of Cell Science*, 118(24), pp. 5755–5765. doi:  
1223 10.1242/jcs.02692.  
1224 Ganim, Z. and Rief, M. (2017) “Mechanically switching single-molecule fluorescence of GFP  
1225 by unfolding and refolding,” *Proceedings of the National Academy of Sciences of the United*  
1226 *States of America*, 114(42), pp. 11052–11056. doi: 10.1073/pnas.1704937114.  
1227 de Gennes, P.-G., Brochard-Wyart, F. and Quéré, D. (2004) *Capillarity and Wetting*  
1228 *Phenomena, Capillarity and Wetting Phenomena*. Springer New York. doi: 10.1007/978-0-  
1229 387-21656-0.  
1230 Gross, P. *et al.* (2011) “Quantifying how DNA stretches, melts and changes twist under  
1231 tension,” *Nature Physics*, 7(9), pp. 731–736. doi: 10.1038/nphys2002.  
1232 Guo, Y. E. *et al.* (2019) “Pol II phosphorylation regulates a switch between transcriptional and  
1233 splicing condensates,” *Nature*, 572(7770), pp. 543–548. doi: 10.1038/s41586-019-1464-0.  
1234 Gupta, A. N. *et al.* (2016) “Pharmacological chaperone reshapes the energy landscape for  
1235 folding and aggregation of the prion protein,” *Nature Communications*, 7(1), pp. 1–8. doi:  
1236 10.1038/ncomms12058.

- 1237 Halperin, A. and Goldbart, P. (2000) “Early stages of homopolymer collapse,” *Physical review*.  
1238 *E, Statistical physics, plasmas, fluids, and related interdisciplinary topics*, 61(1), pp. 565–73.  
1239 Available at: <http://www.ncbi.nlm.nih.gov/pubmed/11046298> (Accessed: May 3, 2016).
- 1240 Han, T. W. W. *et al.* (2012) “Cell-free formation of RNA granules: low complexity sequence  
1241 domains form dynamic fibers within hydrogels,” *Cell*. 2012/05/15, 149(4), pp. 768–779. doi:  
1242 10.1016/j.cell.2012.04.016.
- 1243 Heinrich, B. S. *et al.* (2018) “Phase transitions drive the formation of vesicular stomatitis virus  
1244 replication compartments,” *mBio*, 9(5). doi: 10.1128/mBio.02290-17.
- 1245 Henninger, J. E. *et al.* (2021) “RNA-Mediated Feedback Control of Transcriptional  
1246 Condensates,” *Cell*, 184(1), pp. 207–225.e24. doi: 10.1016/j.cell.2020.11.030.
- 1247 Hernández-Vega, A. *et al.* (2017) “Local Nucleation of Microtubule Bundles through Tubulin  
1248 Concentration into a Condensed Tau Phase,” *Cell Reports*, 20(10), pp. 2304–2312. doi:  
1249 10.1016/j.celrep.2017.08.042.
- 1250 Hyman, A. A., Weber, C. A. and Jülicher, F. (2014) “Liquid-Liquid Phase Separation in  
1251 Biology.” Available at: [http://www.annualreviews.org/doi/abs/10.1146/annurev-cellbio-](http://www.annualreviews.org/doi/abs/10.1146/annurev-cellbio-100913-013325)  
1252 [100913-013325](http://www.annualreviews.org/doi/abs/10.1146/annurev-cellbio-100913-013325) (Accessed: March 9, 2016).
- 1253 Jawerth, L. *et al.* (2020) “Protein condensates as aging Maxwell fluids,” *Science*, 370(6522),  
1254 pp. 1317–1323. doi: 10.1126/science.aaw4951.
- 1255 Jawerth, L. M. *et al.* (2018) “Salt-Dependent Rheology and Surface Tension of Protein  
1256 Condensates Using Optical Traps,” *Physical Review Letters*, 121(25). doi:  
1257 10.1103/PhysRevLett.121.258101.
- 1258 Kapeli, K. *et al.* (2016) “Distinct and shared functions of ALS-associated proteins TDP-43,  
1259 FUS and TAF15 revealed by multisystem analyses,” *Nature Communications*, 7. doi:  
1260 10.1038/ncomms12143.
- 1261 Keenen, M. M. *et al.* (2021) “HP1 proteins compact DNA into mechanically and positionally  
1262 stable phase separated domains,” *eLife*, 10. doi: 10.7554/eLife.64563.
- 1263 Klosin, A. *et al.* (2020) “Phase separation provides a mechanism to reduce noise in cells,”  
1264 *Science (New York, N.Y.)*, 367(6476), pp. 464–468. doi: 10.1126/science.aav6691.
- 1265 Kwon, I. *et al.* (2013) “Phosphorylation-regulated binding of RNA polymerase II to fibrous  
1266 polymers of low-complexity domains,” *Cell*, 155(5), p. 1049. doi: 10.1016/j.cell.2013.10.033.
- 1267 Langmuir, I. (1918) “The adsorption of gases on plane surfaces of glass, mica and platinum,”  
1268 *Journal of the American Chemical Society*, 40(9), pp. 1361–1403. doi: 10.1021/ja02242a004.
- 1269 Larson, A. G. *et al.* (2017) “Liquid droplet formation by HP1 $\alpha$  suggests a role for phase  
1270 separation in heterochromatin,” *Nature*, 547(7662), pp. 236–240. doi: 10.1038/nature22822.
- 1271 Larson, A. G. and Narlikar, G. J. (2018) “The Role of Phase Separation in Heterochromatin  
1272 Formation, Function, and Regulation,” *Biochemistry*. American Chemical Society, pp. 2540–  
1273 2548. doi: 10.1021/acs.biochem.8b00401.
- 1274 Levone, B. R. *et al.* (2021) “FUS-dependent liquid–liquid phase separation is important for  
1275 DNA repair initiation,” *Journal of Cell Biology*, 220(5). doi: 10.1083/jcb.202008030.
- 1276 Li, P. *et al.* (2012) “Phase transitions in the assembly of multivalent signalling proteins,”  
1277 *Nature*, 483(7389), pp. 336–340. doi: 10.1038/nature10879.
- 1278 Li, Y. R. *et al.* (2013) “Stress granules as crucibles of ALS pathogenesis,” *Journal of Cell*  
1279 *Biology*, pp. 361–372. doi: 10.1083/jcb.201302044.
- 1280 Maharana, S. *et al.* (2018) “RNA buffers the phase separation behavior of prion-like RNA  
1281 binding proteins,” *Science*, 360(6391), pp. 918–921. doi: 10.1126/science.aar7366.
- 1282 van Mameren, J. *et al.* (2009) “Unraveling the structure of DNA during overstretching by using  
1283 multicolor, single-molecule fluorescence imaging,” *Proceedings of the National Academy of*  
1284 *Sciences of the United States of America*, 106(43), pp. 18231–18236. doi:  
1285 10.1073/pnas.0904322106.

- 1286 McSwiggen, D. T. *et al.* (2019) “Evidence for DNA-mediated nuclear compartmentalization  
1287 distinct from phase separation,” *eLife*, 8. doi: 10.7554/eLife.47098.
- 1288 Mitchison, T. J. (2020) “Beyond Langmuir: surface-bound macromolecule condensates,”  
1289 *Molecular Biology of the Cell*. Edited by D. Kellogg, 31(23), pp. 2502–2508. doi:  
1290 10.1091/mbc.E20-06-0393.
- 1291 sen Mojumdar, S. *et al.* (2017) “Partially native intermediates mediate misfolding of SOD1 in  
1292 single-molecule folding trajectories,” *Nature Communications*, 8(1). doi: 10.1038/s41467-017-  
1293 01996-1.
- 1294 Morin, J. A. *et al.* (2020) “Surface condensation of a pioneer transcription factor on DNA,”  
1295 *bioRxiv*, p. 2020.09.24.311712. doi: 10.1101/2020.09.24.311712.
- 1296 Naumann, M. *et al.* (2018) “Impaired DNA damage response signaling by FUS-NLS mutations  
1297 leads to neurodegeneration and FUS aggregate formation,” *Nature Communications*, 9(1). doi:  
1298 10.1038/s41467-017-02299-1.
- 1299 Nevers, Q. *et al.* (2020) “Negri bodies and other virus membrane-less replication  
1300 compartments,” *Biochimica et Biophysica Acta - Molecular Cell Research*. Elsevier B.V., p.  
1301 118831. doi: 10.1016/j.bbamcr.2020.118831.
- 1302 Patel, A. *et al.* (2015) “A Liquid-to-Solid Phase Transition of the ALS Protein FUS Accelerated  
1303 by Disease Mutation,” *Cell*, 162(5), pp. 1066–1077. doi: 10.1016/j.cell.2015.07.047.
- 1304 Polotsky, A. A. *et al.* (2010) “A Quantitative Theory of Mechanical Unfolding of a  
1305 Homopolymer Globule,” *Macromolecules*, 43(3), pp. 1629–1643. doi: 10.1021/ma902302p.
- 1306 Quail, T. *et al.* (2020) “Capillary forces drive pioneer transcription factor-mediated DNA  
1307 condensation,” *bioRxiv*.
- 1308 Rogelj, B. *et al.* (2012) “Widespread binding of FUS along nascent RNA regulates alternative  
1309 splicing in the brain,” *Scientific Reports*, 2. doi: 10.1038/srep00603.
- 1310 Sabari, B. R. *et al.* (2018) “Coactivator condensation at super-enhancers links phase separation  
1311 and gene control,” *Science*, 361(6400), p. eaar3958. doi: 10.1126/science.aar3958.
- 1312 Sanulli, S. *et al.* (2019) “HP1 reshapes nucleosome core to promote phase separation of  
1313 heterochromatin,” *Nature*, 575(7782), pp. 390–394. doi: 10.1038/s41586-019-1669-2.
- 1314 Schmid, M. *et al.* (2014) “DNA Virus Replication Compartments,” *Journal of Virology*, 88(3),  
1315 pp. 1404–1420. doi: 10.1128/jvi.02046-13.
- 1316 Schwartz, J. C. *et al.* (2013) “RNA Seeds Higher-Order Assembly of FUS Protein,” *Cell*  
1317 *Reports*, 5(4), pp. 918–925. doi: 10.1016/j.celrep.2013.11.017.
- 1318 Shelkownikova, T. A. *et al.* (2014) “Compromised paraspeckle formation as a pathogenic factor  
1319 in FUSopathies,” *Human Molecular Genetics*, 23(9), pp. 2298–2312. doi:  
1320 10.1093/hmg/ddt622.
- 1321 Singatulina, A. S. *et al.* (2019) “PARP-1 Activation Directs FUS to DNA Damage Sites to  
1322 Form PARG-Reversible Compartments Enriched in Damaged DNA,” *Cell Reports*, 27(6), pp.  
1323 1809–1821.e5. doi: 10.1016/j.celrep.2019.04.031.
- 1324 Smith, S. B., Cui, Y. and Bustamante, C. (1996) “Overstretching B-DNA: The elastic response  
1325 of individual double-stranded and single-stranded DNA molecules,” *Science*, 271(5250), pp.  
1326 795–799. doi: 10.1126/science.271.5250.795.
- 1327 Strom, A. R. *et al.* (2017) “Phase separation drives heterochromatin domain formation,”  
1328 *Nature*, 547(7662), pp. 241–245. doi: 10.1038/nature22989.
- 1329 Thompson, V. F. *et al.* (2018) “Transcription-Dependent Formation of Nuclear Granules  
1330 Containing FUS and RNA Pol II,” *Biochemistry*, 57(51), pp. 7021–7032. doi:  
1331 10.1021/acs.biochem.8b01097.
- 1332 Wang, J. *et al.* (2018) “A Molecular Grammar Governing the Driving Forces for Phase  
1333 Separation of Prion-like RNA Binding Proteins,” *Cell*, 174(3), pp. 688–699.e16. doi:  
1334 10.1016/j.cell.2018.06.006.

- 1335 Wang, X., Schwartz, J. C. and Cech, T. R. (2015) “Nucleic acid-binding specificity of human  
1336 FUS protein,” *Nucleic Acids Research*, 43(15), pp. 7535–7543. doi: 10.1093/nar/gkv679.  
1337 Yin, H. *et al.* (1995) “Transcription against an applied force,” *Science*, 270(5242), pp. 1653–  
1338 1657. doi: 10.1126/science.270.5242.1653.  
1339
